# Supplementary material for: The human origin recognition complex is essential for pre-RC assembly, mitosis, and maintenance of nuclear structure
Source: eLife. 2021 Feb 1;10:e61797. doi: 10.7554/eLife.61797 (PMC7877914; doi:10.7554/eLife.61797)
Supplement: Supplementary file 1. [file elife-61797-supp1.xlsx]

## Sheet: Sheet1
Target	gRNA sequence
CDK1_e3.1	GGGTTCCTAGTACTGCAATT
CDK1_e4.1	AATCCATGTACTGACCAGGA
CDK1_e5.1	ACACAATCCCCTGTAGGATT
CDK1_e6.1	ACTCAACTCCAGTTGACATT
CDK1_e7.1	ACATGGGATGCTAGGCTTCC
CDK9_e2.1	CTGGCCGGTCTTGCGGTGCC
CDK9_e3.1	GATCTCCCGCAAGGCTGTAA
CDK9_e4.1	TTCCCCCTATAACCGCTGCA
CDK9_e4.2	GCTCGCAGAAGTCGAACACC
CDK9_e5.1	ATGTGCTTATCACTCGTGAT
CDK9_e5.2	CAACCGCTACACCAACCGTG
CTRL00001	GGTCCATGGGTGGAGTTACG
CTRL00002	GGACGCTAAACCAACGGTGC
CTRL00003	GCCGTGCCGTAGCTATCCGG
CTRL00004	GTCCGTTCGACAATTTCACA
CTRL00005	GTACAGCTAAGTTAAACTCG
CTRL00006	GCTGCTTGCGATACCAATAG
CTRL00007	GTGACACAGGGAACGAGGCG
CTRL00008	GGACACGGCATTTCCGCTGT
CTRL00009	GCTGGTATACCGTCTTCATC
CTRL00010	GGGACAAGTTGGACAGTTGC
CTRL00011	GTCGGGCCGCTATATAGGCG
CTRL00012	GATTTGATGTGGTGCTCACA
CTRL00013	GAGCAGCGCGACAACCCATT
CTRL00014	GAGTCTGACGTCGACTATCT
CTRL00015	GTGCATCAACAAGTACGCGT
CTRL00016	GTAACGCAGTACTTAGGGCC
CTRL00017	GTAGCCGAATTCGTTACGTA
CTRL00018	GGTGATCCTAGTCGACTGGC
CTRL00019	GGGTGCGACAACAATTGATC
CTRL00020	GCCGCACAGGGAACGCATAT
CTRL00021	GTCCCGAGTCGCGCTCTCGA
CTRL00022	GCTATTGTCGGCTGGATGGA
CTRL00023	GGCTGGTGGCTTACTTACCT
CTRL00024	GATCGGCAGGTTACCTCTGA
CTRL00025	GCTAGATCTACGTAGCGTGC
CTRL00026	GCGGCTAATTGTAGGTCCAT
CTRL00027	GCTACTCCGCATGCCACTAC
CTRL00028	GTGTCGCGAGCACCGCGATC
CTRL00029	GTCGAAGTACTCGTTAAATG
CTRL00030	GCGCCCTCACCGTCGTGATT
CTRL00031	GACATTGTTAGTAACGACTC
CTRL00032	GCCAATCGGATTGTAGAAAT
CTRL00033	GCTCCGACCGTTGATGCAGC
CTRL00034	GTTTGTTAACTAGATACGGG
CTRL00035	GAAGGCGGAGAATCCGGGCA
CTRL00036	GTATTTACTCGGTGTCGTCA
CTRL00037	GATGCGAAACCTAACGCCGC
CTRL00038	GTCGGAGGTAGCCGCCTGTT
CTRL00039	GTTTACGCCTTCACTTGACC
CTRL00040	GGTCGATTCAAGCGGTCGTT
CTRL00041	GTCAATCGGCGTTCGACACA
CTRL00042	GTGGGATCTCATTCGGAGGA
CTRL00043	GCCGGGACCAAAGGCACTGC
CTRL00044	GAGATGTACACTTTGCCAAC
CTRL00045	GCACGTGTAGTCGATCTGAT
CTRL00046	GGTGAGCTCCGACCCGTGGA
CTRL00047	GTGACGCCGGTCCATGCGAT
CTRL00048	GCAACGCGGTGGCGTAACGT
CTRL00049	GGAATAAGGTTCTCGCGAGA
CTRL00050	GTGCGAGCCCAACAGTAAGT
CTRL00051	GAGTAACTCTCTGACCCGCC
CTRL00052	GCATAACGCTAGTGTAACGA
CTRL00053	GCTGGATATTACTACGTCGG
CTRL00054	GGCACGCTCGGGAACCTCTG
CTRL00055	GCTCGTTCGCAGTTGATCGC
CTRL00056	GTATACAACATCGACGTGGG
CTRL00057	GCGCGACCCTCCACTGGCTC
CTRL00058	GTAATAGCTTGCGGTGAGGA
CTRL00059	GGTCCGCACTTTATCAACAG
CTRL00060	GCAGATTCGACGTGCCCGTG
CTRL00061	GTGGTAGCCACCTGGTGCGC
CTRL00062	GCCATCTAGGCCTGTGTTGC
CTRL00063	GCGCCGAGCGTAACAATGTT
CTRL00064	GATTTGTATGAGCTCAACTC
CTRL00065	GACGGTGCCACACTTACCAG
CTRL00066	GGCTATAATACGGTATCGTA
CTRL00067	GTAATCGAGTCGCCTCTGCA
CTRL00068	GTTTCTCGCACCACCTCAAG
CTRL00069	GTGTTCGTACCCGCCACATG
CTRL00070	GTTTCCCAGTGGGTTTACGA
CTRL00071	GAATTGAGACTAGAACGTAG
CTRL00072	GACTACGAGATATACGATCG
CTRL00073	GTCGGCCAGCCAAGACGGTT
CTRL00074	GCTGCCAAGACTTCACGGAA
CTRL00075	GTAACGTCTACTAACGGATC
CTRL00076	GCGCTAGGTCCCTGGTAAGG
CTRL00077	GCGTGCCCGAACCACGGTTC
CTRL00078	GCTTACCTGTTATCGACTCT
CTRL00079	GTACTATTTACGCCCGGTAT
CTRL00080	GCGCATCAATATGCCCGCAC
CTRL00081	GTAGCATCGCGCTCGTACGC
CTRL00082	GAGCCGCTTTCATGATCGAG
CTRL00083	GCGGAATTACTCTAAACTTC
CTRL00084	GGTTGCAATCGCCTAAGACG
CTRL00085	GATCGTGGTTAACTCCGACC
CTRL00086	GTGGTAGAATCCTCAATCGA
CTRL00087	GAGGTCCCGCCTCCGCCCAA
CTRL00088	GCGCCATGTCGCAATACCAG
CTRL00089	GGGACCGAAGACTATTGATC
CTRL00090	GCCGAAATATCCCGCGAATA
CTRL00091	GTAAGCCGAAATACGCGGTT
CTRL00092	GGCATTACCCGCCGTCCGGC
CTRL00093	GGTTCCACCAGGTAGTCGAC
CTRL00094	GCGGACATGACTTCTATCCA
CTRL00095	GTCGTCTCACCGTGCGGCGA
CTRL00096	GGCTAACGCACGCCGAGGTG
CTRL00097	GATTGGCCGGCGACAGCGCT
CTRL00098	GCGGTCTCTCTACTGCGACG
CTRL00099	GTCCACCACCAAGCTTGTAG
CTRL00100	GAACAATGGCTTCGTCGACT
CTRL00101	GACCTTATGTTCGCCGCCTC
CTRL00102	GAGACACCGTAACTCGAATT
CTRL00103	GCTCGTAGGTCAATCGCGGA
CTRL00104	GGACGGTTCCGATAACCTTA
CTRL00105	GGGATCTCTCAATATGGCGC
CTRL00106	GAGCGCCGTTGTTGAGAAGA
CTRL00107	GCCGCCGGCCCTAACTGACC
CTRL00108	GTGACTAGACCCTTACGCGG
CTRL00109	GATCGGAGAGCCTGAAGTTG
CTRL00110	GAGAACTCAGCGGTCTCAAG
CTRL00111	GATGTCCGTTGTAGTCCTCG
CTRL00112	GCCGGTCGCAATTGTTGCTA
CTRL00113	GTGCCTATTCAGTAGGTCGT
CTRL00114	GGTGCGGTAAGCGTGGCTAG
CTRL00115	GCCATGGAGCCCAATCAATC
CTRL00116	GGTGTAGTTCGGATTGATGA
CTRL00117	GGGAATTGGAGACGATGCCG
CTRL00118	GAGTGCCTCGTAGTTGTGGG
CTRL00119	GCCTCGTTTCCACGTAATTC
CTRL00120	GATTAGGTCGTTCTGTAACA
CTRL00121	GCCGGTAGTGACCACGAACA
CTRL00122	GTCTTCGCGAAAGCGTATTC
CTRL00123	GGCCACACACGCGGCTTTAC
CTRL00124	GGGCCTCATTAGTCGTCTGG
CTRL00125	GAAGCCGCGAATGGCTAACT
CTRL00126	GATATGCTAGACGTGACTCA
CTRL00127	GTTAGCAATCGTACGGGTCA
CTRL00128	GTCTCTTCGGATTCTTGGCA
CTRL00129	GCGGGTCTGGAAAGGCGTAT
CTRL00130	GCTCCGTAGTTCGGGACGCT
CTRL00131	GACTCCGGCAAGCCAGCTCT
CTRL00132	GCCCGCTCTAGCCTATAAGA
CTRL00133	GGAAGATTCCCACTCATCCG
CTRL00134	GTACGGATGCTGAACTCTAG
CTRL00135	GAACCTACGGGCTACGATAC
CTRL00136	GCGTGTGAAGGGCGATATAC
CTRL00137	GCTAGGCGCGGGAGTCCGCT
CTRL00138	GGACCCAGCTGCAGTAACGA
CTRL00139	GATTGGTTACCTTGCGTCTC
CTRL00140	GGGTTCTGCCGCTTATAATA
CTRL00141	GGCAATTCAGTGCTATATCG
CTRL00142	GGCGTCGGATCGATGGTTCT
CTRL00143	GTTCGATCCGGCGACTCGAA
CTRL00144	GTCGGTACATGTATAGACGA
CTRL00145	GCGCCACGACGTCCGGCATG
CTRL00146	GGCCTGCCCGCTCGGCATAT
CTRL00147	GTATGCTCTATGGGATAAAC
CTRL00148	GGGTCCTGCCCGTATCACCG
CTRL00149	GAAGGCCAAGGAGGATGATC
CTRL00150	GACGAGACCTTGCGATATAG
CTRL00151	GACCACGCCCGTAATGTGCC
CTRL00152	GCGAATCCCATAACGCCACA
CTRL00153	GATGACGCATCGAGGAGAAG
CTRL00154	GTACTGGCGTTCAACCTAAC
CTRL00155	GGAAGTCAAGTCCGCACCGC
CTRL00156	GCTCGCCTTAACTTGATGGT
CTRL00157	GAGTCGCCACTCTCAGGTAG
CTRL00158	GCGTTTCACACGATCGGAGA
CTRL00159	GGGCCGCGCAGGATAAACAA
CTRL00160	GCAACTCGAGCTTGCGCGGA
CTRL00161	GAGGTTATGTCCCGCACCCG
CTRL00162	GTACGCTGCGACACCCGGTG
CTRL00163	GCTCGGCCTATGCCTATGCC
CTRL00164	GCACCGAATTACGCCAACTC
CTRL00165	GAGCAGACGAGTCGAGACAT
CTRL00166	GTCCCAGGCATTACCATCGG
CTRL00167	GAGTCTATCGTCGAGTGAGA
CTRL00168	GGGTGTGGTCACGCCTTGCA
CTRL00169	GCGATACACTACCGTCTCCG
CTRL00170	GGTCAAACGGTATGGAGGCG
CTRL00171	GGGTTGGCACGTCCAACGAC
CTRL00172	GATTGTCGTTTACGATCCCA
CTRL00173	GTGCTCGGATCAAATCATCA
CTRL00174	GTTCGAAACCCAAAGGCGTG
CTRL00175	GACCATACGAGTAACTGCAA
CTRL00176	GCTCGCGCGCGCTAAAGACT
CTRL00177	GAGTGGATGCGTAATACAAC
CTRL00178	GCATACCCACTTATCACCGC
CTRL00179	GGAGGTCGCTACAAACGGTA
CTRL00180	GGGCGCCTAGCGTTTGGACG
CTRL00181	GGCTGACGGTATGATCAACT
CTRL00182	GGAGCAATCCGAATCGCTTC
CTRL00183	GATGTACGTGCCCACCGGCA
CTRL00184	GCATTCCTTGCTTCGTGCAG
CTRL00185	GGGCGGTCCAAACCTGAACG
CTRL00186	GCCCTACGTTGGAAACCAGT
CTRL00187	GCTTAAACCCGTATACTATG
CTRL00188	GAGTCCGGTTGCCCGTCGTA
CTRL00189	GTACAGAACGGGTCGGTAGC
CTRL00190	GATTGTGGTCTCATCGGGCG
CTRL00191	GAATAATACGGGCCGTTGGA
CTRL00192	GTTGATGTCGAACCCGGAGA
CTRL00193	GTCAGCCCGGGTATCTCGTA
CTRL00194	GTCGGTTTGAGCGTACAAAT
CTRL00195	GGAGGGCTTATTCGCGCCAC
CTRL00196	GGGCCTTAATAGTTCAACGC
CTRL00197	GGATTCTTAGACAGTTGGGC
CTRL00198	GTCGTGGCATAGAGCGACCC
CTRL00199	GTTTACGATTGTCGTTCATC
CTRL00200	GCACCATTGTTGAACGCTCG
CTRL00201	GTCTAACCGAACAATACGAC
CTRL00202	GAGACCGTTAGCCTGAGATA
CTRL00203	GACGTACGATACACGGTTAG
CTRL00204	GTCTCGACGAAACGTGCTGT
CTRL00205	GACGTATCACCATAGAAGCG
CTRL00206	GACTAGATGGGCGTTCTATC
CTRL00207	GCGGGATCTATCTCATCCAA
CTRL00208	GCTTGCCGGGTCTATTAATG
CTRL00209	GACGTTGAGGTCCACTAGCT
CTRL00210	GCTTCGAGGCGTATATGATT
CTRL00211	GCTTTCGGCGCCGGTGGCCA
CTRL00212	GCCACGTTGGTCACTCGGCG
CTRL00213	GCGCCACGGCTGCACTATCC
CTRL00214	GTATTGGTATCTCAGCAGGC
CTRL00215	GGTTTCCGCGGGCCCAGAGG
CTRL00216	GTGTGATCCGACACCTTTCC
CTRL00217	GAACGGTGAGGCGTTAACAA
CTRL00218	GCGAGCCAGCATCCCTTCGC
CTRL00219	GATTGACGCGCTCTATACGA
CTRL00220	GTAGAAGTCCTCCGTCAAAC
CTRL00221	GTTCGGCTCGAGATGAGTAC
CTRL00222	GTTATATCGGGATACTTGAC
CTRL00223	GCGCTCACCATTCGTTGCTA
CTRL00224	GGGATTCCGCCGGTGTTTGT
CTRL00225	GGTCTTTCACGTCCCGCGTA
CTRL00226	GAGGGTCGTGGGTGTTGCGT
CTRL00227	GGCATGGCAGTATCCCATAG
CTRL00228	GCGGTAGGGCGGTATAACCT
CTRL00229	GTTTGCCTTACGCTGGAAAT
CTRL00230	GAAGGAGGCGGCGGTAGTGG
CTRL00231	GGTTCTAAGAACAACTCGAC
CTRL00232	GAGGCACTTGCCGACCTTAC
CTRL00233	GCGCCGCGTGTATCCTATGC
CTRL00234	GACAGACCTCGTAGGGAGCC
CTRL00235	GCGGACGGGTGCAATTAGGT
CTRL00236	GAGCGAGGTCTTCGATGAAT
CTRL00237	GTAGCCGTCACCTTCTGACA
CTRL00238	GATGTCACGCGATGACTCGT
CTRL00239	GCCGCTATCTCTATTACGAC
CTRL00240	GATGTAACAACGCACAGCGA
CTRL00241	GAGGCTTTATCTCTAGACGC
CTRL00242	GTTCTCTCGCCAACCGGTAT
CTRL00243	GGGTCAAGTCAGAGGCGTCG
CTRL00244	GACACCCACTGAGCGCCGCG
CTRL00245	GGACATTCGCGGCATGGCAC
CTRL00246	GCATAGCAACGTTGTGACCG
CTRL00247	GGACGCGTAACGGTCTTATT
CTRL00248	GAGCAATGCGCCGCAACCAT
CTRL00249	GCGTTCGTTCAACCACTATC
CTRL00250	GTACAGGTGAGTAACCGACG
CTRL00251	GCTTAAAGAGATACCGTATC
CTRL00252	GCCGACCTCGGCTGTTCGCC
CTRL00253	GCGGGTTCTATAGACCTCTT
CTRL00254	GCACGGTTTCGCTAATGCTA
CTRL00255	GATTGCGTTGGTTTACTAGG
CTRL00256	GCGAATCGACGGTTGATAAT
CTRL00257	GGTTAGGTAGTATTTATCCG
CTRL00258	GAGCGGTTATCGGCAAACAC
CTRL00259	GGTACTGCACTATTCCCGTG
CTRL00260	GCCGTACTACACGGCTTTCA
CTRL00261	GCTAGGCGACGAAAGCATGA
CTRL00262	GGCGATACCTCCCTATGAGC
CTRL00263	GAGATTGGGCGTTTACTCGG
CTRL00264	GACATAGCAAACTGACGAGC
CTRL00265	GCGAGTAGGTCCAGCTGGAT
CTRL00266	GTTCTTTAGGCAGGCGTGGT
CTRL00267	GAACGATCGACCTTTGCGTA
CTRL00268	GCGACCTTATGAATACGCGA
CTRL00269	GGTGTTGCTAGTACTTAGGC
CTRL00270	GAATGAGTCACTGCCGCGTG
CTRL00271	GCTATTTCGGAATCGTCAGG
CTRL00272	GATTCTTCCGCCGCTTCGTA
CTRL00273	GGTTCCGGGACCGTAACGCT
CTRL00274	GGCCACCTATGACAAACTCA
CTRL00275	GCAGGACGATAGTAACGTCC
CTRL00276	GCTGACTCGCGCGTCGTGCT
CTRL00277	GGGCACCATGCGGAAGATCG
CTRL00278	GGCCGGATGCGAAGCTCGTT
CTRL00279	GGCATTAACGTACTGGCCGA
CTRL00280	GCGTCGGATCATTTCATACC
CTRL00281	GCCGGTTCACTCATAAGTGA
CTRL00282	GAACACACCAAAGCGCCGCT
CTRL00283	GAGTTCCTACCGGCCCGACA
CTRL00284	GTCGAAGCGAGCAAGGTCAC
CTRL00285	GACTGGCCGAAGCTTTAGCG
CTRL00286	GGGTGTACCAAATAGTGATC
CTRL00287	GGATACGAATGACTTCGGAC
CTRL00288	GCATTTGTTCCAAATACGTC
CTRL00289	GGTACGAAGAACCCTATCTC
CTRL00290	GCCTCGTCTGAGGTTAATGG
CTRL00291	GCAGCCAGCGGTTGAACGCT
CTRL00292	GACGGCACGCCGCACTTGCA
CTRL00293	GGCCGTTTCGATTGTGCAAG
CTRL00294	GGTATGCCAACCGAACCGTA
CTRL00295	GCGACAATGAATGTCGACAT
CTRL00296	GTGTAATCCAAAGACGTCAG
CTRL00297	GAAGATTTACGACACTTCGT
CTRL00298	GGATCATGTCTTACTATCGG
CTRL00299	GGTAGGGTGTTGTCGGGTAT
CTRL00300	GAATCATACGTGTCGAAATG
CTRL00301	GGCCGTAATACAGGTATGTA
CTRL00302	GCGAATTGTCCCATTTCCGT
CTRL00303	GGACGATCTGTCAAGAATAT
CTRL00304	GCCGCGGTTCAGTAACGCTA
CTRL00305	GTATAATTCGTGAGCGGGTG
CTRL00306	GATTCTGTAGAACAGACCGT
CTRL00307	GCAGCGTTGATTGAACGAAA
CTRL00308	GCAGACTTCTATACTTGTCG
CTRL00309	GGTGCGCTGATTCATACGTG
CTRL00310	GACTACCAGAGCGACCCGTC
CTRL00311	GGAATCCATCGGGCGAATAC
CTRL00312	GGCCTAGACGAGTCGCGTTG
CTRL00313	GATATGGTAGCGGCGATCAA
CTRL00314	GACACGCCCGCGGTAGGTGC
CTRL00315	GAATAGTGGTTCGCGATCGC
CTRL00316	GTTACGGGATAACCCGCCCG
CTRL00317	GCTAACACGCCTACTAATGC
CTRL00318	GGATTCCGCCCTAGGTGGTA
CTRL00319	GACGTTGCGCCTGCCCGCAT
CTRL00320	GAGAACGTGATAAGACTCGG
CTRL00321	GTATCAAACACGTCCGCGCA
CTRL00322	GAAGCGCATTTAGCCGAAGA
CTRL00323	GATGAGGTCCCTATAGAGCG
CTRL00324	GCCACAGGAGCATATTCCGA
CTRL00325	GTACCGTACCTCTTGCGGTG
CTRL00326	GCCGGTCCGCCGGCGAACTT
CTRL00327	GAAACCGCGTCTAAATCCGA
CTRL00328	GACCTGTCCGTGACGATAGG
CTRL00329	GAGTGGCTCCTTTGTCGCGT
CTRL00330	GGTTAGTATATTCCGGTGCT
CTRL00331	GCGCAACCGTGGATAGGGTT
CTRL00332	GAGTACGTGTCCATATCAAT
CTRL00333	GTTAGAGCTATCGCTCGCGG
CTRL00334	GCGTATTTGGTGAATGTGGA
CTRL00335	GGGATCGCTCCCTTTATCGA
CTRL00336	GAATACTACGGGCACGGACA
CTRL00337	GATTCCGCACCGTGGATCCA
CTRL00338	GCCTCAGGTCTTTCTATCCG
CTRL00339	GGACCAAACATGGGCTTGCG
CTRL00340	GGCACCGAGTGTTCGACGCA
CTRL00341	GCTAAGGGACGGGCGCATGG
CTRL00342	GTCAGCTAAATCACTACGAG
CTRL00343	GGCGGCCGCTAGTATGGCAT
CTRL00344	GCTCGAGCGACGTGGTAGGT
CTRL00345	GCACGTATGTAACACTACGA
CTRL00346	GGTTTCAGAGGACGCAAAGT
CTRL00347	GGGCTTCTGGCGATCTAGCA
CTRL00348	GGATAGCGGGCCTGATATCT
CTRL00349	GCCCATAATGTTGAACGCAC
CTRL00350	GTCCAAGCTTCGTGTGGTAA
CTRL00351	GTAGACCTCTTCGCCTGCAA
CTRL00352	GGATCCATACGACGTAGCGC
CTRL00353	GCTGCGTAGTACAATAGCGT
CTRL00354	GGCTAACACTAGCGAGTGAG
CTRL00355	GCGACGCGCGTTGTTCTAGC
CTRL00356	GCTACTCTGGCTCACGTTAG
CTRL00357	GACAACAACGAGAGCTCGTG
CTRL00358	GGCGCCTGAAGTGTCTACGT
CTRL00359	GTTTCGAGGCTATGGGAGTT
CTRL00360	GATTGCCCTAGGTACTCGTG
CTRL00361	GGGCGCCAGTACACGACTTC
CTRL00362	GACTTGTGTGTAATTCGCCC
CTRL00363	GCTAGCACGCCGCCGGTTTC
CTRL00364	GGCTAGACCACGCGCGATTG
CTRL00365	GATATCTTTGCAGCTAGCTC
CTRL00366	GTAGGCCCGAAAGGCTTAAT
CTRL00367	GTTAAATCGCGCGGCGCTCC
CTRL00368	GTCAGGCGACGCTCGACATA
CTRL00369	GGCTGTGGACCACATCGTGA
CTRL00370	GCTCGGAAGCGTGAAGGGCT
CTRL00371	GCCCACGTGCTTCCTGCCGG
CTRL00372	GATTACCCAGTAGCAAACGC
CTRL00373	GATCTTCGCCGAGCTCGCTT
CTRL00374	GTTGCCACATCCCACCAACG
CTRL00375	GCGACCACTCTACGATATCA
CTRL00376	GATCCATGTGAAACCGCTAC
CTRL00377	GTATAGCGTAACCCGACCGG
CTRL00378	GCGTATCAGGCGGTCGTAGG
CTRL00379	GCGCGAGCACTACCAGAAAC
CTRL00380	GACGTGGGAGCATCGGCAGT
CTRL00381	GTCTTATGGTGACGATCAAA
CTRL00382	GACACTGTAAACCAACGACA
CTRL00383	GCGACTGAACTGGCTTCGTG
CTRL00384	GCAATGACTCTGCGGATTCT
CTRL00385	GATAGTTAAGGCCGACGTAC
CTRL00386	GTCAGAGGCACGGATCCGTA
CTRL00387	GTCGTCGTTGCCAGTTGGTG
CTRL00388	GCCACTTATAGCCACTCAAT
CTRL00389	GCTTTCGACTGGTTAGGTGT
CTRL00390	GGGTAGGAACTGAGAAGCGT
CTRL00391	GACCTGTCAGGTAGAACGAT
CTRL00392	GTGTATAGTTTCGAATAGCG
CTRL00393	GGTAGAAAGAACGATTATGG
CTRL00394	GCTTAGCCGGCGCGTTTATC
CTRL00395	GAACTATAGCGGCTTAGAAT
CTRL00396	GACGTGCGTCTTCATCGAAA
CTRL00397	GCGTACCAACACGTGATGTT
CTRL00398	GATAGCGTGTCCACAGATGA
CTRL00399	GACACAACTACGTCAGTCCG
CTRL00400	GCTAGTTCAGCGACTATCGC
CTRL00401	GATCCCTTAACGAATTCTAG
CTRL00402	GCCCAGCTGTCAAAGTCGCC
CTRL00403	GCGAGCTCACGGGCGAAGGC
CTRL00404	GAAATCACTCTACGAGGCTA
CTRL00405	GGACTGACGTATACGCTTGC
CTRL00406	GTGATACGTCTGTACTTAGG
CTRL00407	GCCGAGCACGCGTAAAGCTA
CTRL00408	GCGACGCACTTTACGCAAAC
CTRL00409	GCACCGAATACAGCGGCTGT
CTRL00410	GCACTAATCTTGGTACACCT
CTRL00411	GGTATCTGGGCAGTGGTACG
CTRL00412	GTCTGATTTCAGCCGGTGGT
CTRL00413	GGATATTCCCGACGAACCCT
CTRL00414	GCTAGAATCACTGTGATCGT
CTRL00415	GTTTCGACCGTCCCGTCGCC
CTRL00416	GAACCGCAATCCTGGTGTAC
CTRL00417	GCCATCCTCGCACAATACGT
CTRL00418	GTGTACTGCCGATACACTCC
CTRL00419	GGTGGTATCTGGTCGTCGAC
CTRL00420	GCGACCTGTTTGCTAGGCGT
CTRL00421	GTGATGTCCATCTCAACGAA
CTRL00422	GCGCAGCGGCTGCCCAGGAT
CTRL00423	GCAGTAGAAACGAGGCGAAC
CTRL00424	GTGGTTATTCGGCAGATCCG
CTRL00425	GCCGGCGCCAAGCTAGTACA
CTRL00426	GTCGGACACTCGGAACCGCC
CTRL00427	GAGATAAGCAGCGATACACG
CTRL00428	GTCGGGTTCCCATCCCTTCA
CTRL00429	GGTTCCCGACGCGAGTGATA
CTRL00430	GTAAATCTGCGGGATATTGC
CTRL00431	GCGAGGGTGGCCACGTATTT
CTRL00432	GCGAACACACCGCTACGGCG
CTRL00433	GATCTCGGCTTGTCGCAGCT
CTRL00434	GCGTTATGGCTCCGACCGGC
CTRL00435	GATATCGCCGAGGACGTGCT
CTRL00436	GATGTCTGACGGCACGCGTG
CTRL00437	GAAAGACCACCGTCGGACGA
CTRL00438	GTTAGACGCGCAACACCGCA
CTRL00439	GCAGAACCCGTACTAATATC
CTRL00440	GTCCGCTAGTGCCTCCACAT
CTRL00441	GGTTCTACCGGATTACCGAC
CTRL00442	GCGCATATCCTGTCCGATAC
CTRL00443	GTAGGCTCCCTTCGCCAATA
CTRL00444	GCAGGGACACATTCGTGTTC
CTRL00445	GGAGCCGATTGCTCTTAGCA
CTRL00446	GCTAAACGTTCCTCTCGCAG
CTRL00447	GCTAGGAAATCCCGACGTAA
CTRL00448	GCTATACGCTCTAGGCCAAT
CTRL00449	GCCGGCCCTTTACGAGGGCA
CTRL00450	GTCACACGCTTACGGCTTAC
CTRL00451	GCGTTAGGGAAGGGCGGTGT
CTRL00452	GTGATCTCACCGGCACGTGA
CTRL00453	GGGTCGACCATTCGGGACGA
CTRL00454	GACCGCTAAGAACAGCGCTC
CTRL00455	GAACGAGTCGCATCCGATGT
CTRL00456	GAGGTAGATGTGTCTTGTGA
CTRL00457	GTCAGCCCATTGTGTAACGG
CTRL00458	GCTTGGCCGAAACAGGCGAA
CTRL00459	GTCATCGCGGTTTGCGTACG
CTRL00460	GCCCAAACTGTGCTACCGCA
CTRL00461	GCACGGACTGGTTCCGACAT
CTRL00462	GTACAGGAAGCATCCGTAGG
CTRL00463	GGCCCGGATGTCTGGAGCCA
CTRL00464	GAATCTCGTACCGTACACGA
CTRL00465	GCGAGCTCCATCTCACCAGT
CTRL00466	GCGGATATGACTATGATTGG
CTRL00467	GGATGGACTCCTGCTACGCC
CTRL00468	GCATCTACGGCCGATGTTCT
CTRL00469	GTATGTCGTCGCTTGCCCTG
CTRL00470	GCGACGCGCTGCGACCCTTC
CTRL00471	GATCAAGACAACGGTCGACA
CTRL00472	GGTATTGTAGGAAGCACCGC
CTRL00473	GCGCTACGTAGTGGGTACAT
CTRL00474	GCGCAAGGAGTCCGGACCGG
CTRL00475	GCGGACCTCCCGTTTGGAGA
CTRL00476	GTCTACGCTGACCCGGGTAT
CTRL00477	GCGAGTGCTTACGTTAAGCT
CTRL00478	GTTGCTGGCTTACTCTAAGT
CTRL00479	GTTACGGAGTTTCACCTCAG
CTRL00480	GAAGCTGCTGTTGCCCGACC
CTRL00481	GTAACGCGCTTGGGTCAAGC
CTRL00482	GACCTGATGGCCGAGATTAA
CTRL00483	GGTAACCTGCTGCCTAGCGT
CTRL00484	GTGAATACCCGTGACGGACA
CTRL00485	GAGTGAACGACGCCTACGAG
CTRL00486	GGAGGATTGGACGTTCCCTA
CTRL00487	GAGGTTAGAGCTTCGTGGTC
CTRL00488	GCTCAATATATCGTGACCGA
CTRL00489	GAGACCTTCGTTTCCCGCGT
CTRL00490	GCATGCGACCATTAGGACCC
CTRL00491	GTGGCCTCGTCAAATCGGAT
CTRL00492	GGATACTTCTTCGAACGTTT
CTRL00493	GGCAATCGGCACGGCAAGGT
CTRL00494	GGCAATACTAGGCCTTGCTG
CTRL00495	GTTCGCAGCAAAGATTACCC
CTRL00496	GTAGTTTATTTCCGTATCGC
CTRL00497	GGTAGGAATCTAGAACTCGG
CTRL00498	GACGCGTCATAGCGGATAAA
CTRL00499	GGCCTAACCCACATAAGCGG
CTRL00500	GTCCACGACGACCTAGAATC
hROSA	AGTCGCTTCTCGATTATGGG
Neg_GeCKO_1	ACGGAGGCTAAGCGTCGCAA
Neg_GeCKO_10	ACGGGCGGCTATCGCTGACT
Neg_GeCKO_100	AAGAGCGAATCGATTTCGTG
Neg_GeCKO_1000	GACAATCATGGTGAAAGCGG
Neg_GeCKO_101	CGGCTCGTTCTACGCACTGA
Neg_GeCKO_102	TCCAGCGCGAGCTTACTCGT
Neg_GeCKO_103	GGAGTGGTCCCGTACGCAAC
Neg_GeCKO_104	CAAGACCTTATCGTGCAGCG
Neg_GeCKO_105	ACGTCGTTTAGCACCCGGCT
Neg_GeCKO_106	TTTCAGGCTACGGGCGCGGG
Neg_GeCKO_107	CAATCGGCGACGTTTTAAAT
Neg_GeCKO_108	GTACCCCTATGGCCGTTCTA
Neg_GeCKO_109	TACCCACGCGTATTCCATCT
Neg_GeCKO_11	CGCGGAAATTTTACCGACGA
Neg_GeCKO_110	CTTGTTGCGTATACGAGACT
Neg_GeCKO_111	GAACGCCGCTCAAGTTGATA
Neg_GeCKO_112	CGCAGTACGTATAGACTTAA
Neg_GeCKO_113	GCGAACCCCGTAGCCAGGCT
Neg_GeCKO_114	CCTCGGGCGTAAATACTCAT
Neg_GeCKO_115	AGGGCACCCGGTTCATACGC
Neg_GeCKO_116	CACGGCCTAACTTGCTGATA
Neg_GeCKO_117	CCGGGAGATTAACGTTAATT
Neg_GeCKO_118	ATCTCGGGTCGACTGCGGAT
Neg_GeCKO_119	CGCCGGGACCGTTAGGGAAT
Neg_GeCKO_12	CTTACAATCGTCGGTCCAAT
Neg_GeCKO_120	GCAAACCCGAGTGACACGTC
Neg_GeCKO_121	GTGCGTGAGTATTAACGCTC
Neg_GeCKO_122	GCTTAACCTATCCGCCAGTA
Neg_GeCKO_123	TGGCCACGAATTCCGCCGCC
Neg_GeCKO_124	GTAAGGCCCGCGTACGAGCT
Neg_GeCKO_125	CTCCTTACGTCGGGCATTAA
Neg_GeCKO_126	ATTCCTTCGGCGCTCTGCGT
Neg_GeCKO_127	ATGCGCTTTAATCGCCGTTC
Neg_GeCKO_128	TTAGCCCTCGATTGGTTGCG
Neg_GeCKO_129	AACGCTGTCGTACGTGTATA
Neg_GeCKO_13	GCGTGCGTCCCGGGTTACCC
Neg_GeCKO_130	TAACGCGCATATCTGAACAC
Neg_GeCKO_131	CGCTAGGTTATTTCGTGGCC
Neg_GeCKO_132	AATATTTGGCTCGGCTGCGC
Neg_GeCKO_133	CAATATCGGGTGCTACAGGA
Neg_GeCKO_134	CGGCCGCATCCTGTTATATT
Neg_GeCKO_135	CTGGATCGCCCGCAGAAATA
Neg_GeCKO_136	ATTAGCACGGCGACCTTCTA
Neg_GeCKO_137	TGGAAATCGACTGTGCGCTT
Neg_GeCKO_138	ATTAGCCGTTGCCATATCAA
Neg_GeCKO_139	ACCCGATAATAGCTACTGGT
Neg_GeCKO_14	CGGAGTAACAAGCGGACGGA
Neg_GeCKO_140	ATTCAGCGCGCTCGCCCTGG
Neg_GeCKO_141	CCCGCCGAAGACCCTGCTTG
Neg_GeCKO_142	TGCCGTGAAAAGACGCTGCG
Neg_GeCKO_143	CTTACGCGCCTGGTCAAAAG
Neg_GeCKO_144	CGCATAAGTCGATAGACACA
Neg_GeCKO_145	GTCATCAGCGATTTGACGAG
Neg_GeCKO_146	CGAATCGGAACTTTGTACCG
Neg_GeCKO_147	AGGTCAAGCCGACCTCGAAC
Neg_GeCKO_148	TGCGCCTTACTCGTTAACTG
Neg_GeCKO_149	ATCTGAGCGTTTTCGGCCGC
Neg_GeCKO_15	CGAGTGTTATACGCACCGTT
Neg_GeCKO_150	ACGGTACATGCGCATGAGTC
Neg_GeCKO_151	TGACGCGATAGAGTTGGCTT
Neg_GeCKO_152	TTCACCGTCCACGTGCGCAT
Neg_GeCKO_153	TTCTTCGGCCTACACCCGGT
Neg_GeCKO_154	GGAATTACGACTAACCGATT
Neg_GeCKO_155	TGCGGGGAGCTCTCTTAATG
Neg_GeCKO_156	TAGAGATATCCGATCGTGGT
Neg_GeCKO_157	GGGTGCCCACTAATAGCCGC
Neg_GeCKO_158	TGCAGTCGCGCTGAGCGTCA
Neg_GeCKO_159	GGATTGAATGGCTAACGCGG
Neg_GeCKO_16	CGACTAACCGGAAACTTTTT
Neg_GeCKO_160	GCGGTTCCGGGAGCACATTT
Neg_GeCKO_161	GAAGACGTGCTGGCGTCACC
Neg_GeCKO_162	GGCGCATTAAAGTCGAGAGC
Neg_GeCKO_163	GACGTAGCCTTCCGAAATAT
Neg_GeCKO_164	GGTTCGAGACCTACTTAAGT
Neg_GeCKO_165	TGAAGTGGGGCGTCGGACAC
Neg_GeCKO_166	CTATATTGTCGCGCAGTGGA
Neg_GeCKO_167	CGGCTTTGTTGCCCGTAAGC
Neg_GeCKO_168	TCCCGGTTGGTGAACGATAC
Neg_GeCKO_169	TTAACTCGAACGCTCGAAAG
Neg_GeCKO_17	CAACGGGTTCTCCCGGCTAC
Neg_GeCKO_170	GGACTATCCACCGTTTACTC
Neg_GeCKO_171	CAGTAGCGATCGAATGTCAA
Neg_GeCKO_172	TAGGCGCCCGTAGCATTGGA
Neg_GeCKO_173	GCGGCGTCTGGGAATCGTTC
Neg_GeCKO_174	CAGTGTCCGAGCGATATTTT
Neg_GeCKO_175	TTCAATCACCTCACGGTAAG
Neg_GeCKO_176	CGGTTTACATCTGCCCATCG
Neg_GeCKO_177	GGGCGTGTATGTTCGTATTG
Neg_GeCKO_178	GCGGCGTCATCCACGCGTGC
Neg_GeCKO_179	GGGTATAGACGCGATCCTCA
Neg_GeCKO_18	CAGGAGTCGCCGATACGCGT
Neg_GeCKO_180	ACAGCGCTCTCGTGTACTAT
Neg_GeCKO_181	ACTAGCCTGTTCGCGAGTAG
Neg_GeCKO_182	GACCGCGTGAGATAACGTCA
Neg_GeCKO_183	CGCGTGCATCTGCCGAAGGC
Neg_GeCKO_184	AAAACATCGACCGAAAGCGT
Neg_GeCKO_185	ACACCGAAGCACCTGTACGT
Neg_GeCKO_186	GGGTCGAGGACTAATAGATT
Neg_GeCKO_187	ACGCCTCCTCAAATTAGCTC
Neg_GeCKO_188	CCTACGCGGTAGGGAACTTT
Neg_GeCKO_189	AAGCACTAGTCCGTATGATG
Neg_GeCKO_19	TTCACGTCGTCTCGCGACCA
Neg_GeCKO_190	AGGCGCCAACATTGACCGTA
Neg_GeCKO_191	TAATCATGCACATTCGGGAC
Neg_GeCKO_192	CGTCGGGTAGCTATTTCTTT
Neg_GeCKO_193	GTGCGACGAATTGTCCTGAG
Neg_GeCKO_194	CTTCCGTTATTCGGAAGTGA
Neg_GeCKO_195	TACTGGAGTTTGCGACTCGG
Neg_GeCKO_196	ATCCAGATCACCACGCGTCA
Neg_GeCKO_197	CGTTAAGACTAGCTCGGTTT
Neg_GeCKO_198	ATACGGCCGAAGCCCCTTCA
Neg_GeCKO_199	AACATCTCGTTAGGGGTATC
Neg_GeCKO_2	CGCTTCCGCGGCCCGTTCAA
Neg_GeCKO_20	GTGTCGGATTCCGCCGCTTA
Neg_GeCKO_200	GTCAGGTAATAGTCGGACTC
Neg_GeCKO_201	TTCGAGGTCCGGACAGGTCG
Neg_GeCKO_202	TGAGCATTCGTAGCCCAGCA
Neg_GeCKO_203	TAAGGCGACCTGCGCTTGTG
Neg_GeCKO_204	AGCTGCGCGCTACTGGATCA
Neg_GeCKO_205	GCAAAAACCCAACGCTATTC
Neg_GeCKO_206	GCCGCCGATTTCATAAGTAA
Neg_GeCKO_207	GTTCCGTGAGGGTTACTTCA
Neg_GeCKO_208	CGGGGAATTGCACGGCGGAA
Neg_GeCKO_209	TGTCTTTAAACACGCCATCG
Neg_GeCKO_21	CACGAACTCACACCGCGCGA
Neg_GeCKO_210	ACAAAATGCCGTGCGTCAAT
Neg_GeCKO_211	ACGCTCAGCACCCGCTATGC
Neg_GeCKO_212	CGAAACCCTCTTAAGTTAAC
Neg_GeCKO_213	TAAACCCTTGGCGCCCTCAC
Neg_GeCKO_214	CCATTCTCAACCGGTCCAAT
Neg_GeCKO_215	GTTATTGACCCGTCGGGAGT
Neg_GeCKO_216	GGTTTCACTTCGAGACCGGC
Neg_GeCKO_217	CTTTGATAACGTGGGCGGTA
Neg_GeCKO_218	CCCCAACTTTCGCGACTCCG
Neg_GeCKO_219	CAAACAGTCTAAGGCGACGA
Neg_GeCKO_22	CGCTAGTACGCTCCTCTATA
Neg_GeCKO_220	CGGCACACCAATGCGTTCGT
Neg_GeCKO_221	ATCGATATACCGCCATAAAA
Neg_GeCKO_222	GGGACGCGAAAGAAACCAGT
Neg_GeCKO_223	AACGCGAGTCCGGTGGCTAG
Neg_GeCKO_224	TGTCATTAGCGTAACGATAT
Neg_GeCKO_225	AGGGCGAGCAGCAGAGTACG
Neg_GeCKO_226	CCGTCTCCGCATCGTCTTTT
Neg_GeCKO_227	CGTGCGTGAAATCGCTAGCT
Neg_GeCKO_228	ATCAGGCCTTGTCCGTGATT
Neg_GeCKO_229	CGTCCAGAAGAACGGCCCCT
Neg_GeCKO_23	TCGCGCTTGGGTTATACGCT
Neg_GeCKO_230	AGAGCGTCTTCGTGACAAAC
Neg_GeCKO_231	GATGGCGCGCAGTTGAGTCA
Neg_GeCKO_232	ACGCTGACGAGTAAAAGCGG
Neg_GeCKO_233	TATCAATCGTCCGGGTCACT
Neg_GeCKO_234	TCAGATTCCGCAAGGGTCCA
Neg_GeCKO_235	GCGATCGGAGTGCCACGATA
Neg_GeCKO_236	ATATAAACTGTCGCGGTAAA
Neg_GeCKO_237	GTTACCTGCTACGAAAACGA
Neg_GeCKO_238	GAAGCGATCCGAGAGTGTAT
Neg_GeCKO_239	ATGACATTGCGCGTCTACGG
Neg_GeCKO_24	CTATCTCGAGTGGTAATGCG
Neg_GeCKO_240	ATACCAGATGCGTCCGCTTG
Neg_GeCKO_241	AACGTGCTGACGATGCGGGC
Neg_GeCKO_242	CGGCACCTGTTAGGCTATTC
Neg_GeCKO_243	AGGATCGTGTACCGGGGACG
Neg_GeCKO_244	CGACAACGTGCAGGTGTATC
Neg_GeCKO_245	ACTCGAAATCACCTATGGTA
Neg_GeCKO_246	TCTCGTAGCCTAATGCGCCA
Neg_GeCKO_247	TTATGTGAGCACGCCATTAC
Neg_GeCKO_248	CGACGGTAATGCACCTACTA
Neg_GeCKO_249	ATCTGTGTGACTGCGGTCGG
Neg_GeCKO_25	AATCGACTCGAACTTCGTGT
Neg_GeCKO_250	TGGAAAGCGAGCACACCGTC
Neg_GeCKO_251	CAGCGCCGAAACTCTTTCCG
Neg_GeCKO_252	TGCCGTTAGCATGCGATCCC
Neg_GeCKO_253	TCGTAAACACACGACCAAGT
Neg_GeCKO_254	ACTACTCCGGCAAATACTCG
Neg_GeCKO_255	GCCCTTCAATGCGTTCCGTA
Neg_GeCKO_256	CAACACCCCGCGTTATGCTA
Neg_GeCKO_257	GCTGATATATACGACAAGCC
Neg_GeCKO_258	GGTATTCCGAAGTCCTCCGC
Neg_GeCKO_259	GGTCGCCTGTGCGACATGCT
Neg_GeCKO_26	CCCGATGGACTATACCGAAC
Neg_GeCKO_260	CTAATCACGACCTCACCCTA
Neg_GeCKO_261	ATCGGTACCTCTTCACATAT
Neg_GeCKO_262	TTGCGTCAGCGCTGCACATC
Neg_GeCKO_263	CGGTGTGCCCCCAAATATTG
Neg_GeCKO_264	CGTGCGGTAAATACGAAATA
Neg_GeCKO_265	ATACGAGGCGCTTTTCTTTG
Neg_GeCKO_266	TGTGCACAAGTCGCAACGAA
Neg_GeCKO_267	CTCGGCCCACTTGCGTTATA
Neg_GeCKO_268	TATACTGCGGATCAATCTGA
Neg_GeCKO_269	AAAGCGACGTAGGCATACTT
Neg_GeCKO_27	ACGTTCGAGTACGACCAGCT
Neg_GeCKO_270	ACGATCGGTAATGGTCTGTT
Neg_GeCKO_271	GGGCCTACGATCAGAGGTGT
Neg_GeCKO_272	CGCAGTCATTCGATAGGAAT
Neg_GeCKO_273	GGCGATTCGGGTGGAGGTCG
Neg_GeCKO_274	AGTTGAATGGACCTCGACTA
Neg_GeCKO_275	GAGTAATTTCGAACGTATTG
Neg_GeCKO_276	TTCCACGGTAAAATCGGTCA
Neg_GeCKO_277	ACTGTTGCCGCGCCAACTGC
Neg_GeCKO_278	CCGGCAAGAAACTATACTTG
Neg_GeCKO_279	TAGTGGGAATGGTCGCGTAG
Neg_GeCKO_28	CGCGACGACTCAACCTAGTC
Neg_GeCKO_280	CCGCTGTCTCACTAATCTCA
Neg_GeCKO_281	TGCTACCTTCGGGACCACCA
Neg_GeCKO_282	CTTAGCTGACCGACAAGGTG
Neg_GeCKO_283	CTTAAGCTTATCAACATCCG
Neg_GeCKO_284	ACGGAAAGACCTCGCTATTC
Neg_GeCKO_285	CCCTTCTGGCGGGCCAAACA
Neg_GeCKO_286	TCTGACGATTAATGCTTCTA
Neg_GeCKO_287	GCGGAATGAACACGAGGTAG
Neg_GeCKO_288	CAGACGGTTGGTAAGGACGC
Neg_GeCKO_289	GGGACTGATATATGGCGAAC
Neg_GeCKO_29	GGTCACCGATCGAGAGCTAG
Neg_GeCKO_290	AGAAGACCGAGGCGCTTCAA
Neg_GeCKO_291	CAGGTTTGCACGCATAGCTA
Neg_GeCKO_292	GGCCGTCGTATTCCCCCAAG
Neg_GeCKO_293	CTCCCATTGATCTACGATGG
Neg_GeCKO_294	TTTCGTGCCGATGTAACACA
Neg_GeCKO_295	ATCACGTGATCGGATGGTTC
Neg_GeCKO_296	GCCTATCGGCATTCCCACTG
Neg_GeCKO_297	CAACGACGGGCCTAGTCTCA
Neg_GeCKO_298	ATATTTCGGCAGTTGCAGCA
Neg_GeCKO_299	GATATCCCGCGAAAAAATCT
Neg_GeCKO_3	ATCGTTTCCGCTTAACGGCG
Neg_GeCKO_30	CTCAACCGACCGTATGGTCA
Neg_GeCKO_300	TCACTTGTCTATACGGGGTA
Neg_GeCKO_301	ATGTTATTACAGACGCGTGT
Neg_GeCKO_302	TGGGAATTCCTCGGCCGATT
Neg_GeCKO_303	CGCCTCTCACGTGTAGGCTT
Neg_GeCKO_304	GGGCGCTAAGATATATGCCC
Neg_GeCKO_305	CGTCATATACACAAACGCCC
Neg_GeCKO_306	CGTTGGGCATAGCGAACACT
Neg_GeCKO_307	GCGGGGCGGTGACTTTCAAG
Neg_GeCKO_308	AAGGGCGTGCCCTGCGTTGT
Neg_GeCKO_309	GCGTTCCCCCACTGACGGGG
Neg_GeCKO_31	CGTATTCGACTCTCAACGCG
Neg_GeCKO_310	GATCCAGGAGTGATCGAGTA
Neg_GeCKO_311	AGCATTTGCGCGGCAACTGT
Neg_GeCKO_312	TTGTCCCTGAGAAAACGCGG
Neg_GeCKO_313	GTCCTCATCCGGTCAGGCTG
Neg_GeCKO_314	TATAGCTGTTTCGAAGGCGC
Neg_GeCKO_315	CGTGGTAGGGGTTTCCTCAA
Neg_GeCKO_316	CCATCACCGATCGTGAGCCT
Neg_GeCKO_317	TGAATCGTAACCTCGCCATT
Neg_GeCKO_318	AAGAAGGGCCGTACCCGAAA
Neg_GeCKO_319	CGTGTTTGGAATTTGCCGCG
Neg_GeCKO_32	CTAGCCGCCCAGATCGAGCC
Neg_GeCKO_320	CAAGTGAGCATAAGCGATGT
Neg_GeCKO_321	AGGACTAGTGTCGCACTCAG
Neg_GeCKO_322	GGCACTCCGAAAGACCTTAT
Neg_GeCKO_323	CCCAGGTGTATAATGAAACG
Neg_GeCKO_324	GACCGCAAAGTGGTCCGAAG
Neg_GeCKO_325	GTTGCGAGTTACTATTGGTT
Neg_GeCKO_326	TCTAAAGCCGTCCTGATGTT
Neg_GeCKO_327	GCCGTGGTATCAAGTCGGTA
Neg_GeCKO_328	CGCAATCCCTTAGGATAGCC
Neg_GeCKO_329	ATAGGCACCTTAAGGGTCTC
Neg_GeCKO_33	GAATCGACCGACACTAATGT
Neg_GeCKO_330	TTTGGGTTTATCCGCCCCCA
Neg_GeCKO_331	CTAGAGGGGTATAGCAACAA
Neg_GeCKO_332	CTCGGGACTAACGTGAGAGC
Neg_GeCKO_333	CCCCGTAGCTCATTAGTCTG
Neg_GeCKO_334	GAAAACACGATGACGTCTCT
Neg_GeCKO_335	GACGCCCTAATGCCCATCGT
Neg_GeCKO_336	GGATATTGAGTAAACCCGAT
Neg_GeCKO_337	TGACTCGGGCAATATCGGTT
Neg_GeCKO_338	GATCTAGTCCTCTAATCGAT
Neg_GeCKO_339	CATAAGGTTAACTGCGTGGA
Neg_GeCKO_34	ACTTCAGTTCGGCGTAGTCA
Neg_GeCKO_340	GGTACCTGAACAACGGCACC
Neg_GeCKO_341	TGGCGGCCCAAACTTAACAC
Neg_GeCKO_342	GGGCGGTCAGGTCGCTCCGA
Neg_GeCKO_343	TCCGGAGGCTCAAACCAAGT
Neg_GeCKO_344	GCTTGCTATATGGGTGCGAG
Neg_GeCKO_345	TCGGCTACGGCGTGGAGAAG
Neg_GeCKO_346	CCCGTGGCGTGCGCACCTGT
Neg_GeCKO_347	GGCTGGTTGACGACTCCTGA
Neg_GeCKO_348	GGTGCGGTCTGCTTGTAGAT
Neg_GeCKO_349	TGCCTATGACCTAGGTACCA
Neg_GeCKO_35	GTGCGATGTCGCTTCAACGT
Neg_GeCKO_350	GACAGATCACGTATCAGGGC
Neg_GeCKO_351	GAGGTATGTCATCGCCATGA
Neg_GeCKO_352	GCCATTCTAGTCCCGGCATA
Neg_GeCKO_353	TGAATCGAATACAAACGATG
Neg_GeCKO_354	GTTACGTACCCTCCAACTTC
Neg_GeCKO_355	CCAATGATAAGCCCGAACGG
Neg_GeCKO_356	AGCGATTCACGTATTAGATG
Neg_GeCKO_357	GCCAACAAGAATCGGATCCC
Neg_GeCKO_358	ACTTACGGCACTCGCATGCC
Neg_GeCKO_359	GATATGGCTCGAGTAATCTT
Neg_GeCKO_36	CGCCTAATTTCCGGATCAAT
Neg_GeCKO_360	GTATCCCATATCGGCACAGG
Neg_GeCKO_361	ATGCTGCAGCTTTACGATCA
Neg_GeCKO_362	GAGTGATGCTTAGACTCCGT
Neg_GeCKO_363	ACATACCCCCCTGGTTCAGA
Neg_GeCKO_364	GCCCCTTATGATTGTTATAG
Neg_GeCKO_365	AGGTCGGCCGAACATACGGT
Neg_GeCKO_366	ATTGCGCAATCCTTAGGATA
Neg_GeCKO_367	GAAGCGGGACCGTGTCTCAC
Neg_GeCKO_368	GTGTATGATGCTTCGACTTA
Neg_GeCKO_369	CCTACTCCCGTGTGTTATCC
Neg_GeCKO_37	CGTGGCCGGAACCGTCATAG
Neg_GeCKO_370	ACAGCCCTCACGAGCCCGAA
Neg_GeCKO_371	GCTGTTGTAACGGTAGATAT
Neg_GeCKO_372	TACGAAACATCATGGGTTCC
Neg_GeCKO_373	CGCACGACCATTGCTGCTGC
Neg_GeCKO_374	CATTGCACGCCACAGCATTG
Neg_GeCKO_375	CGATGCCCGTCTATGGCCCG
Neg_GeCKO_376	CCAGCAATACCCCGGTATGG
Neg_GeCKO_377	TCGAGATGCGCAGCAGATGA
Neg_GeCKO_378	ACGGGGTGAAACCATGTCGT
Neg_GeCKO_379	CCTTGGCGAGACGGAGGTAC
Neg_GeCKO_38	ACCCTCCGAATCGTAACGGA
Neg_GeCKO_380	CCATAGCTCTAGCGATAAAC
Neg_GeCKO_381	AGCTAGCGATGGCTCTAAGT
Neg_GeCKO_382	CGGGTCTCCAAAGATCGCTT
Neg_GeCKO_383	GGTCCGCGCACAAGAGCAGG
Neg_GeCKO_384	CAACCGGCGGGCCCCTACAA
Neg_GeCKO_385	TCCTCGATAGCTGGAATCCA
Neg_GeCKO_386	TACGGATCACCAAATCTTAG
Neg_GeCKO_387	CTCGCACCATTGAGGGTAGT
Neg_GeCKO_388	TCGGGGACCACCCACGATCC
Neg_GeCKO_389	CCTGCGGTGCACGGCTAGCC
Neg_GeCKO_39	AAACGGTACGACAGCGTGTG
Neg_GeCKO_390	ACCGCTCATATAGGTAAAAA
Neg_GeCKO_391	AGTATTGTGGTGTCGTCAAC
Neg_GeCKO_392	TGACGCTCCACGTCCGGACC
Neg_GeCKO_393	GCTCGCAAGTATTTAAGGAC
Neg_GeCKO_394	GCCAGGGTTCTTGGTCCCGA
Neg_GeCKO_395	GTCGCTGCGCCAGTGAGAAC
Neg_GeCKO_396	CCCGCTAACAGCCTAGATCA
Neg_GeCKO_397	TTGTACGGTACTGGCTTTGT
Neg_GeCKO_398	CAGGCTGCGCTTCGCAAGCT
Neg_GeCKO_399	GCCTAGTCTCGGTAAGAGTG
Neg_GeCKO_4	GTAGGCGCGCCGCTCTCTAC
Neg_GeCKO_40	ACATAGTCGACGGCTCGATT
Neg_GeCKO_400	GGACGCACCATTCCGGGTGA
Neg_GeCKO_401	GATTGTGGTCGCTCAAAACC
Neg_GeCKO_402	CTATAACCGAATCAAAGGGT
Neg_GeCKO_403	AAATTGGCTTTCGTTCGTGC
Neg_GeCKO_404	TCACCTCCGAACGAACACCT
Neg_GeCKO_405	GGAGATGCGGCCTTCTCAAA
Neg_GeCKO_406	CTTAGGATTCCGAGGTATCT
Neg_GeCKO_407	GAACTGGCAAACAGGCGTGG
Neg_GeCKO_408	CCTGTCGCTATCGTTAGAGA
Neg_GeCKO_409	ATAGCAGGACGAGGTTCCTT
Neg_GeCKO_41	GATGGCGCTTCAGTCGTCGG
Neg_GeCKO_410	GGCGTCAAAATTAGAAGCCG
Neg_GeCKO_411	TCGGCTACAATCTTTGGCAT
Neg_GeCKO_412	GCACGCTGTACAGACGACAA
Neg_GeCKO_413	GAGAGCGTTAGCGTGGGATG
Neg_GeCKO_414	TTCAATTCACCGAGGGCGCA
Neg_GeCKO_415	TTCGTGGTAGGTATAACTAT
Neg_GeCKO_416	TGAGCGGCCTCTAATTAATC
Neg_GeCKO_417	CGCTAAATTGTCACACGTTT
Neg_GeCKO_418	GGTTAACATCGCCACTCTGA
Neg_GeCKO_419	GTTTCTCTTGAACCCCGCGA
Neg_GeCKO_42	ATAATCCGGAAACGCTCGAC
Neg_GeCKO_420	ATGTCTAGACCTAATCGTTT
Neg_GeCKO_421	ATTCATGCGCCGCCTCCTCT
Neg_GeCKO_422	ACCCATTGAGAGTCGCCTGA
Neg_GeCKO_423	CACCCGGAACCACTACTGAG
Neg_GeCKO_424	GCTGAACGCCGACAGGACGG
Neg_GeCKO_425	GCCCAGACGCCCTAGAATAG
Neg_GeCKO_426	GGGATGCGTCTTGCTAAACC
Neg_GeCKO_427	ATCGTTGCTGACAGGATCTA
Neg_GeCKO_428	TAGTCTCACCTGATGGCGTG
Neg_GeCKO_429	CCCTACCTATCCGGTGCTTT
Neg_GeCKO_43	CGCCGGGCTGACAATTAACG
Neg_GeCKO_430	GTTATCCTGTCGAAGTAAAG
Neg_GeCKO_431	TACTTTTTGGAATCCGTCTA
Neg_GeCKO_432	CAGCGGTGCTATTTGGTCTT
Neg_GeCKO_433	CTGCGTGTCTTGCTCGCATG
Neg_GeCKO_434	CCTAGTTCATAAGCTACGCC
Neg_GeCKO_435	TGTCTTCGGATAGGCGGCTT
Neg_GeCKO_436	CGCACATCTAAAGTTACTAC
Neg_GeCKO_437	GTAGGGTACAGCGTCAGCTT
Neg_GeCKO_438	GAAATGCTATGCTTCGGTTC
Neg_GeCKO_439	TCAACCCCAGCGCACCGTTG
Neg_GeCKO_44	CGTCGCCATATGCCGGTGGC
Neg_GeCKO_440	AATGCGAGTGTATCCGCAGT
Neg_GeCKO_441	TTTATGCATTTAATACGCCG
Neg_GeCKO_442	CATTGCACTCGTTGCCAACG
Neg_GeCKO_443	GCCCCGTAAATCTCATTACA
Neg_GeCKO_444	TCCGTCTGCTTCATGAGCGG
Neg_GeCKO_445	CTCGGAATACTCCTATTACA
Neg_GeCKO_446	CTAACGGACTGCAGAACGGA
Neg_GeCKO_447	ACAAAGATCGCATGGCATAC
Neg_GeCKO_448	ATCTTCTCGACGAAAATGCG
Neg_GeCKO_449	CATGGCCTACGGTGTCTTTG
Neg_GeCKO_45	CGGGCCTATAACACCATCGA
Neg_GeCKO_450	CTGGCCGAATCTCACTATGT
Neg_GeCKO_451	GGGGCTTACGTGAAGGGCGG
Neg_GeCKO_452	ACACCCATTCTCATAACGGA
Neg_GeCKO_453	GGCCACGAAGGGCGAAAAGG
Neg_GeCKO_454	TAACCGATACTCCCCACATT
Neg_GeCKO_455	GCACATCGTTATATACCAGA
Neg_GeCKO_456	CGAGCAAAGATTGTTGGATA
Neg_GeCKO_457	GCCACACGAATCATAAAGAG
Neg_GeCKO_458	GAGAGTGCGCCTTGATAGTA
Neg_GeCKO_459	GGATTTGTCGCTTGCCACAC
Neg_GeCKO_46	CGCCGTTCCGAGATACTTGA
Neg_GeCKO_460	GGCTTACGTGGGGGGCAAAA
Neg_GeCKO_461	CGTTGTAGGGTCTTTCTTGA
Neg_GeCKO_462	ATTGCTCTGTCGCATCAATC
Neg_GeCKO_463	CTCAGTGGATACGATTTGCT
Neg_GeCKO_464	ACTACTGGCTATCCGCGCCA
Neg_GeCKO_465	ACCCAATGTGGCGGAGCCGA
Neg_GeCKO_466	ACCTATAATCGACCACATTT
Neg_GeCKO_467	TAGGAGCTGTATCTAGTGGC
Neg_GeCKO_468	CCAATCTTGAACGTCATGTT
Neg_GeCKO_469	ACCCATATATGCTGCCGCAC
Neg_GeCKO_47	CGGGACGTCGCGAAAATGTA
Neg_GeCKO_470	GCCAGGGTATGGGCATCTCG
Neg_GeCKO_471	CATAGGTCCCTAGCAACTCC
Neg_GeCKO_472	ATACGCATGATTGCAAGAGG
Neg_GeCKO_473	TTCGTAGGAACTAAACTGTA
Neg_GeCKO_474	TTTGGTCAACGCATAGCTTG
Neg_GeCKO_475	CGGTGCTGTGAAAGCCGAGC
Neg_GeCKO_476	GGCCCTCTAGAAAAGTCTCG
Neg_GeCKO_477	ACGGTTATGGTCTCATGGGG
Neg_GeCKO_478	AACTAGAATAGGCGGGCTTG
Neg_GeCKO_479	TAATCACATTGCTTAACCGG
Neg_GeCKO_48	TCGGCATACGGGACACACGC
Neg_GeCKO_480	ACTGCTCCCGGTCGCCCCTC
Neg_GeCKO_481	CGCCCGTTTATGTGGCTACC
Neg_GeCKO_482	GAGTACAGCGATTCCTCATG
Neg_GeCKO_483	TTTCTAGTTACTACTGGACG
Neg_GeCKO_484	CACGCACAATCCTTCACGCA
Neg_GeCKO_485	TGCCGCTATACTAAAACCTT
Neg_GeCKO_486	GTTTACTCATATCCAGTCAC
Neg_GeCKO_487	TCGGCTCCTGAAGCCAGTAT
Neg_GeCKO_488	TCGATGTAGCCCCGCCCAAG
Neg_GeCKO_489	AGACCCCGTAGGCAGGACGT
Neg_GeCKO_49	AGCTCCATCGCCGCGATAAT
Neg_GeCKO_490	TCCCAAGGGTTTAAGTCGGG
Neg_GeCKO_491	TATACCAGACCACAGCGCCG
Neg_GeCKO_492	CGTGCCTTTACATTCACTTT
Neg_GeCKO_493	TTTTGACTCTAATCACCGGT
Neg_GeCKO_494	GCTGTTCCGAAGTTGAGAAT
Neg_GeCKO_495	GCTTAAGTCACGGCTTTCCA
Neg_GeCKO_496	ACTAGAGTCATGATCAGCGA
Neg_GeCKO_497	CTGCCCCAGGCGTAATCCTC
Neg_GeCKO_498	GTCCCGTGATTTTAGCCAGG
Neg_GeCKO_499	GCTTCGCTGGCAGGACCTCA
Neg_GeCKO_5	CCATATCGGGGCGAGACATG
Neg_GeCKO_50	ATCGTATCATCAGCTAGCGC
Neg_GeCKO_500	CGTAATTTTGTAATCGCTTC
Neg_GeCKO_501	AGTCTTGGCCAATGTCACGG
Neg_GeCKO_502	CCCGGACGTCAAAGCTGGAT
Neg_GeCKO_503	GGTCTCACCTGCACCCCGAA
Neg_GeCKO_504	GGTAGACGGGGCATCTCAGC
Neg_GeCKO_505	ATGTAACGAGTTGTAAGTCA
Neg_GeCKO_506	TAGTCAACATTCGCAAGAGG
Neg_GeCKO_507	TTTACGAAGTATACCAGGTC
Neg_GeCKO_508	GTAGCTGCTGTAAATCGCAT
Neg_GeCKO_509	CGAAACCTCCTAACTGAGAG
Neg_GeCKO_51	TCGATCGAGGTTGCATTCGG
Neg_GeCKO_510	ATAAGCCACACTACCCGCCT
Neg_GeCKO_511	TACGTAAGTGACGACAGGAA
Neg_GeCKO_512	CTTTATCTGGCGTGGGGTAT
Neg_GeCKO_513	TTAATTTGGGTGGGCCCTGC
Neg_GeCKO_514	CCACTGGTAAAGGCTAGACT
Neg_GeCKO_515	CCCCTATGCAGACTACAATT
Neg_GeCKO_516	CTGGTGACCGACAATTACAC
Neg_GeCKO_517	CTGTCCACCTACAGCGATGT
Neg_GeCKO_518	ACGTGGGGACATATACGTGT
Neg_GeCKO_519	TCTGGCTTGCACCGTGTCAT
Neg_GeCKO_52	CTCGACAGTTCGTCCCGAGC
Neg_GeCKO_520	GTCCAATAAAAAGTGCCACT
Neg_GeCKO_521	GTTCCCCGGGAAGTCTATGC
Neg_GeCKO_522	CTGACGTGTCTGAAATGAGT
Neg_GeCKO_523	ATTTCCCTACGGAGATATCC
Neg_GeCKO_524	ATCAAGTCAGGTTATGCGGG
Neg_GeCKO_525	GGATACCTGGGCCGACTTTC
Neg_GeCKO_526	CTCCGTTATGTGGCATGAGA
Neg_GeCKO_527	CGCAGGCTAGATGACACCAG
Neg_GeCKO_528	TTCGGAACTTACTCAGGGTA
Neg_GeCKO_529	GCGGGCAGAACGACCCTGAC
Neg_GeCKO_53	CGGTAGTATTAATCGCTGAC
Neg_GeCKO_530	ATAGGTCATCCACTGGGCGG
Neg_GeCKO_531	AAGCGGGCACACATGACAAG
Neg_GeCKO_532	CCGTGTTCCACAACTACCCT
Neg_GeCKO_533	GTAAAGAAGCGGAAAGGTCC
Neg_GeCKO_534	GCCTGCCCTAAACCCCGGAA
Neg_GeCKO_535	TACGTCATTAAGAGTTCAAC
Neg_GeCKO_536	CGATGGATCCCTAGTTCCTG
Neg_GeCKO_537	GCTGCGGCGAGATCACATAA
Neg_GeCKO_538	CGCGCACCACGGGCGCGCAC
Neg_GeCKO_539	CATTGTATGAACGCAATAGC
Neg_GeCKO_54	TGAACGCGTGTTTCCTTGCA
Neg_GeCKO_540	CAGAGCCTTGCGCAATTTTG
Neg_GeCKO_541	TGCAGGTCTAGGTCCCAAAG
Neg_GeCKO_542	CCGCGCATTTCAGAGCACAA
Neg_GeCKO_543	AAAACAGGACGATGTGCGGC
Neg_GeCKO_544	ACCTATTGTCCCTTCAAGCT
Neg_GeCKO_545	AAAAAGCTTCCGCCTGATGG
Neg_GeCKO_546	TTGCAAAGCTGATCGGCTGT
Neg_GeCKO_547	AAAATTATCGGAAACGGTAG
Neg_GeCKO_548	CTGTATTAACGAACCTTGTG
Neg_GeCKO_549	AGTCATAACTGAGTGAATCG
Neg_GeCKO_55	CGACGCTAGGTAACGTAGAG
Neg_GeCKO_550	TAGTTACAGACTCAGCGGGT
Neg_GeCKO_551	CCAGGCTGAAGTTCGTACCT
Neg_GeCKO_552	TATTTATACACTATGCGGCA
Neg_GeCKO_553	CACTTACACATGAGGCGGTA
Neg_GeCKO_554	TTTCGCCCAAGAGGCTTGGG
Neg_GeCKO_555	CGCGTGTAGCTGGAGACAAG
Neg_GeCKO_556	CGGAGTTAACCTGGAACCTT
Neg_GeCKO_557	AGCGCTCTGGTTGCATCCCT
Neg_GeCKO_558	ATAGAAGTGTGACCGCTGGG
Neg_GeCKO_559	GGTTGCTGTGACGAACGGGG
Neg_GeCKO_56	CATTGTTGAGCGGGCGCGCT
Neg_GeCKO_560	GTATTAAGATGCGTCTTAGA
Neg_GeCKO_561	GGCCACAAAAACTCGCTAAG
Neg_GeCKO_562	TCTCTCGGAGTGGAGCAACA
Neg_GeCKO_563	GAACCGACTTGAAGGGGGCT
Neg_GeCKO_564	ACTGAGTGGGTAACACGCAT
Neg_GeCKO_565	CCTAAGGGGTACCACCATGG
Neg_GeCKO_566	TCCCCGAGACCATCTTAGGG
Neg_GeCKO_567	CCTAAACTCAGACGCACTAC
Neg_GeCKO_568	TACCCTGGATTGTCCTTGCG
Neg_GeCKO_569	ACGCCATATTTCTGGCTCTA
Neg_GeCKO_57	CCGCTATTGAAACCGCCCAC
Neg_GeCKO_570	CATCTGTAGGGTTGCAAGCC
Neg_GeCKO_571	TAGCTCGAGTCATTTCTCTA
Neg_GeCKO_572	TTTAACTGTCCCGGTGTGCA
Neg_GeCKO_573	CCTCGTCCAGATTCCGGCGG
Neg_GeCKO_574	AATGGGTTGCCGGGAGTAAA
Neg_GeCKO_575	TGGATCGGCAGTGGTACTGG
Neg_GeCKO_576	AAATACAAGCTATAGCGATA
Neg_GeCKO_577	CATGAGCGCATTGAATAATA
Neg_GeCKO_578	GACTTTGGTTGAGCTTCAAT
Neg_GeCKO_579	GTTGGCATATTGGCCCAGAC
Neg_GeCKO_58	AGACACGTCACCGGTCAAAA
Neg_GeCKO_580	GGAACCCTCCCTGCGATAGA
Neg_GeCKO_581	CTCACGGGGACATACAGGGC
Neg_GeCKO_582	GATCATAATCGCTTCAAGCA
Neg_GeCKO_583	CGACCCGGAGGATGAGATGT
Neg_GeCKO_584	TATTTTGACTTGACGCAGGC
Neg_GeCKO_585	CGGGATGGTCCCTGCCGAGA
Neg_GeCKO_586	TAGATTGGCCCCACAAAGCG
Neg_GeCKO_587	CCACACCTGTCTAGCATGAC
Neg_GeCKO_588	GAACCCAACCTTTTACCGCA
Neg_GeCKO_589	GTACACACTTATGCCATCAC
Neg_GeCKO_59	TTTACGATCTAGCGGCGTAG
Neg_GeCKO_590	GAGTCGAAGATGGTCTAGGA
Neg_GeCKO_591	TTCCTGCCCGAACTGCAGAA
Neg_GeCKO_592	CGGCTGAGGCACCTGGTTTA
Neg_GeCKO_593	AGGTTGAATACCCCTTACTA
Neg_GeCKO_594	CCTGCGCGTAGAACAGTGGT
Neg_GeCKO_595	CACGCTTCTGCCATCACCGG
Neg_GeCKO_596	AATCGCAGGTATCCCAGAGC
Neg_GeCKO_597	TCGGGCAGTGAGTACAATAC
Neg_GeCKO_598	GAGACCACTTTCGTGCAAGC
Neg_GeCKO_599	TGTCCCTTGCAACCTCCGTT
Neg_GeCKO_6	TACTAACGCCGCTCCTACAG
Neg_GeCKO_60	TTCGCACGATTGCACCTTGG
Neg_GeCKO_600	ACAAACGACCTTGAGCAGGG
Neg_GeCKO_601	GTACATTCCAGTATTCACGC
Neg_GeCKO_602	GGAGAGGGCCCGCGAACTCA
Neg_GeCKO_603	GGCTGGTTGACCTTCCCGCT
Neg_GeCKO_604	GATGTGATCTATGGTTGCGA
Neg_GeCKO_605	ACGTCAACTGCTGGAGTGGG
Neg_GeCKO_606	ATTTAAACCGTTACACAGTC
Neg_GeCKO_607	CACGCCAACTAAAACTGCAG
Neg_GeCKO_608	CCTAGAGGTCCCAAGGCGTG
Neg_GeCKO_609	CCGTTGATCCCCAGGCGTGC
Neg_GeCKO_61	GGTTAGAGACTAGGCGCGCG
Neg_GeCKO_610	CCTCGATGGTCACCTGTAGC
Neg_GeCKO_611	GTGCGCATGGGCTGATGTTA
Neg_GeCKO_612	AGACTCGTATTGTCATATTA
Neg_GeCKO_613	GGATCTAGCTACCTCAAAAG
Neg_GeCKO_614	AGAACCCAGACGCCAGCGGT
Neg_GeCKO_615	CGAACTTCTGGCTGCAGTTT
Neg_GeCKO_616	ATATGACAGGGCAAACGCAT
Neg_GeCKO_617	GGGACATCCTTGCCGTCTCA
Neg_GeCKO_618	AGCATTCTCACCAAGACCGA
Neg_GeCKO_619	ATAGTAACGTCAGGGAGTAA
Neg_GeCKO_62	CCTCCGTGCTAACGCGGACG
Neg_GeCKO_620	CGAATATTATTTCTATCGGG
Neg_GeCKO_621	GAGTGTAAGCTAACACTCTG
Neg_GeCKO_622	ATACAATACTTTGGCGCATA
Neg_GeCKO_623	CTCCCTGCCGGCCGGGTTAG
Neg_GeCKO_624	GAACCTCCCCGAATATCTGG
Neg_GeCKO_625	ATCTTCAGGGTAACTACGAA
Neg_GeCKO_626	TTCTAAGCCACGTGTGGTAC
Neg_GeCKO_627	AGAAACTGAACTATCCTACT
Neg_GeCKO_628	CAGACCTAGCTCCGCTCCCA
Neg_GeCKO_629	AAATGCACAGATCGCTGATC
Neg_GeCKO_63	TTATCGCGTAGTGCTGACGT
Neg_GeCKO_630	TCAATTCTCACTCACGACCA
Neg_GeCKO_631	ACGGTGGGGATGGACCTACT
Neg_GeCKO_632	TGTGTTAGCCGAGATCTCTG
Neg_GeCKO_633	GCTAGTGTCGTGGGGGATGA
Neg_GeCKO_634	CGAAGTCTTTCTTAGATGGT
Neg_GeCKO_635	TATTTCTCCTAAGTCTAGCG
Neg_GeCKO_636	ATGCGAAACGACATTTATTA
Neg_GeCKO_637	CATGATAGATCAGTCTTCCC
Neg_GeCKO_638	AGTGGGGCGCTAAGTGGGGG
Neg_GeCKO_639	CCCAATGGCTTCTGCGTGAC
Neg_GeCKO_64	TACGCTTGCGTTTAGCGTCC
Neg_GeCKO_640	AGATTCATTCACGAGTTGGG
Neg_GeCKO_641	AGCTTTCGAAATTGAGTGTC
Neg_GeCKO_642	CTAAGTTTGTTAATGGGCCA
Neg_GeCKO_643	CTTTTTTTATTTATCGATCG
Neg_GeCKO_644	TGTAGCTAAGTGAGTATGCC
Neg_GeCKO_645	AGTAGACGGACGGTGAGCTG
Neg_GeCKO_646	TTGTCCGTGACCCTGATTAA
Neg_GeCKO_647	TCTACGTGTAGTTGTACATA
Neg_GeCKO_648	CAATGGCGTGGACATTTGAT
Neg_GeCKO_649	TTCAGCGAGTGTGACTAAGC
Neg_GeCKO_65	CGCGGCCCACGCGTCATCGC
Neg_GeCKO_650	CACATGGGGTACAGCACACC
Neg_GeCKO_651	CAAAAGTCTCGCTTGGTCCT
Neg_GeCKO_652	GGTTTTATAAGGGTGGGCCT
Neg_GeCKO_653	TCGGAAGCAAACTTCTGGAG
Neg_GeCKO_654	ACTATCATGGCACCCAATTG
Neg_GeCKO_655	TTAGCCAGTAGTGCATATGA
Neg_GeCKO_656	GGGACTGTAGGAACATCCGC
Neg_GeCKO_657	AAGAATTAGGCACGGTTACT
Neg_GeCKO_658	TTTTTCTCACCCGATGAATC
Neg_GeCKO_659	AAACCCTATGCCCAAATGAG
Neg_GeCKO_66	AGCTCGCCATGTCGGTTCTC
Neg_GeCKO_660	AGGCTTAAATGGCGAGATTG
Neg_GeCKO_661	CATTAGTCTGATACCTGTGC
Neg_GeCKO_662	GGTGCTTAGCTCTGCGCACA
Neg_GeCKO_663	AGGCCACAAATTGTATACAG
Neg_GeCKO_664	ATGCCTTAGACTTAACCTCG
Neg_GeCKO_665	CCAGTGCCCTTTTGTCGCAA
Neg_GeCKO_666	AGCGATCTGGACACTCTCCA
Neg_GeCKO_667	AGTCTTAAAGACCCTAAGCT
Neg_GeCKO_668	AGGTAAGCCCCTTAGAACTG
Neg_GeCKO_669	TTGGTCCGAGTCTGGAGAAA
Neg_GeCKO_67	AACTAGCCCGAGCAGCTTCG
Neg_GeCKO_670	CAAAAAGGCGTTTGAGCGTG
Neg_GeCKO_671	GTGTAAATCTGTCCAAGTAG
Neg_GeCKO_672	AATCTTACTCGTCCTCCTTG
Neg_GeCKO_673	GACCTATGCCAGAAAGTTCG
Neg_GeCKO_674	ATGCGCAGCTCCAGAATTTT
Neg_GeCKO_675	GGTCCCTCAGGGTGCAACTT
Neg_GeCKO_676	GCCCCAAGCTAGAACTCAGC
Neg_GeCKO_677	CCATTCCGTAAGGGCTTGGA
Neg_GeCKO_678	AAACCTAGCCCCAATACTTA
Neg_GeCKO_679	TACGGGTGTCTCCATCTTGC
Neg_GeCKO_68	CGCAAGGTGTCGGTAACCCT
Neg_GeCKO_680	GGTCTGCTCCAATGGGAACC
Neg_GeCKO_681	CTTACCCCTATTATAATGAA
Neg_GeCKO_682	GAGCAATCCAAAGTTAACGG
Neg_GeCKO_683	TCACTTTACACTTGTAGTGT
Neg_GeCKO_684	TTCTTAGAAGTTGCTCCACG
Neg_GeCKO_685	ATCTCTATACTGTCACTCGC
Neg_GeCKO_686	GAACGTAGAAATTCCCATTT
Neg_GeCKO_687	CGAGTGGGAAACGGGAATCA
Neg_GeCKO_688	ATTGAGAATTCGTTTCAAGG
Neg_GeCKO_689	CATCATAAATGTACAACGGG
Neg_GeCKO_69	CTTCGACGCCATCGTGCTCA
Neg_GeCKO_690	TCCCTCCTAGTCAAGAAGAG
Neg_GeCKO_691	CGACTGACCCCTGGGTGAAG
Neg_GeCKO_692	GAACGTCCAAGCAAGGGAGC
Neg_GeCKO_693	GGGTGGTCATTCTCTACTTG
Neg_GeCKO_694	AGTGAGTGACAACCAGATCG
Neg_GeCKO_695	GGAAACTGGGTTTCATCGTC
Neg_GeCKO_696	TATGACCCTGTTACATTGCC
Neg_GeCKO_697	TGAGCATGTCGGGAGTAACT
Neg_GeCKO_698	CGGTGAGCCACACGAAGGAA
Neg_GeCKO_699	TGGGGACGTTTATCAATATA
Neg_GeCKO_7	TGAGGATCATGTCGAGCGCC
Neg_GeCKO_70	TCCTGGATACCGCGTGGTTA
Neg_GeCKO_700	GTTCATTTCCAAGTCCGCTG
Neg_GeCKO_701	CGTCCCTTCGTCTCTGCTTA
Neg_GeCKO_702	TGCATGCCGAGCATTTTCAA
Neg_GeCKO_703	GTTTTTGGTTAATTGCCTAC
Neg_GeCKO_704	CGGGTTATGTGATGCCATCT
Neg_GeCKO_705	CATTAGCAGCCCAGCGCCCA
Neg_GeCKO_706	ATCAGCCCATTTCTGCGCAC
Neg_GeCKO_707	GTGAAACAGAGGGTCCATCA
Neg_GeCKO_708	CGTAGTAAATATCTAGCTAA
Neg_GeCKO_709	ATTAAACGACACCTTATTCT
Neg_GeCKO_71	ATAGCCGCCGCTCATTACTT
Neg_GeCKO_710	CCCTCAGGAGCTACTAAGGT
Neg_GeCKO_711	GAGGGGGCTTCAAACATGTG
Neg_GeCKO_712	TCGCAAGGAAGCCAGCTAAG
Neg_GeCKO_713	CGGAGCTTAGCGTGGGGGCG
Neg_GeCKO_714	GCTCCCATCCATAGTAAAAA
Neg_GeCKO_715	TGACTAGCTCTTACATATTC
Neg_GeCKO_716	CCTTATGGAATCAGACCGTT
Neg_GeCKO_717	CGTCAAGTATTAAGCTGCTT
Neg_GeCKO_718	ATAGCGGATGTCCTTGGAAA
Neg_GeCKO_719	ACGCATGCTTCCCAAAGCGT
Neg_GeCKO_72	GTCGTCCGGGATTACAAAAT
Neg_GeCKO_720	AGTATTAGGTACCTGCCCTA
Neg_GeCKO_721	TAGAGTGCATAAGAGAACCA
Neg_GeCKO_722	AGTGTATCTTCCACCTGTCT
Neg_GeCKO_723	AGTATGAGACTCATAGGGTG
Neg_GeCKO_724	GAGTTTCTAGTAGTGGTAGG
Neg_GeCKO_725	GAAACGAGAAGTTTGTACTA
Neg_GeCKO_726	AGCCCGCCACAGAATAGCTG
Neg_GeCKO_727	GTTGATCGAAAATGGGAGAA
Neg_GeCKO_728	TAGGGGATTAGCTGACAGTC
Neg_GeCKO_729	GCTTGCATAATTCTGGCCAG
Neg_GeCKO_73	TAATGCTGCACACGCCGAAT
Neg_GeCKO_730	GCTAAGGTCATGTTTGCAAT
Neg_GeCKO_731	GACACTATCCAACCCAAGAG
Neg_GeCKO_732	GAGTTATTTATTCTCTCGAG
Neg_GeCKO_733	CAGTCGTTTCTATGGGATCT
Neg_GeCKO_734	AAAATCGATGGGCTGAATCT
Neg_GeCKO_735	GTTCTGCCACCGACTTGGCC
Neg_GeCKO_736	GACGCCTTGCCCGGCTCACA
Neg_GeCKO_737	ATTTAGTAATGCACACCCAG
Neg_GeCKO_738	TAGTTCTAATCGTTCCTTGA
Neg_GeCKO_739	CTTTTCAGCTGAGACGTACG
Neg_GeCKO_74	TATCGCTTCCGATTAGTCCG
Neg_GeCKO_740	CACCCTTATATTCAGTAACT
Neg_GeCKO_741	TGCCCACTTAGCAACACTCT
Neg_GeCKO_742	CACTGCAGTATTCGTGGCCT
Neg_GeCKO_743	TGCCTCTCCCTTACCCGGAC
Neg_GeCKO_744	AGAGCATGATGACCCGTGAC
Neg_GeCKO_745	GGTGTCACCACCGCTTACCA
Neg_GeCKO_746	CAGCCTATTTTGCTACCTAC
Neg_GeCKO_747	GCCAGCGGGGATATGGTGAA
Neg_GeCKO_748	ACGCTCTCCTGGCAACAAGT
Neg_GeCKO_749	TGGAGAAACGAGGTGTAATA
Neg_GeCKO_75	GTACCATACCGCGTACCCTT
Neg_GeCKO_750	TATAGACCTCCCAAATACAT
Neg_GeCKO_751	GGCGTTAATTAAACTGTTTT
Neg_GeCKO_752	CAGGGTTGCGCAGAGGACTC
Neg_GeCKO_753	AAGTGACGGTGTCATGCGGG
Neg_GeCKO_754	TGTCAGTAGTCAGGACCCCG
Neg_GeCKO_755	GGAATCCGGAGCTCATGAGG
Neg_GeCKO_756	CATTAAACCTTGCCCCACAA
Neg_GeCKO_757	CGGCACTAGAAGTTTTTGAA
Neg_GeCKO_758	CCAGTTATAATTAGGGGTTT
Neg_GeCKO_759	CCTCTCACCGACTCTGTGTC
Neg_GeCKO_76	TAAGATCCGCGGGTGGCAAC
Neg_GeCKO_760	TAACCCAGAAGCCCATTCAG
Neg_GeCKO_761	GCAGTACTACTGAGTTTTTC
Neg_GeCKO_762	CGACCCATGGATGTGAACCC
Neg_GeCKO_763	AGATGGTCAGATCTAGTAGT
Neg_GeCKO_764	CCACGATGCCACCTCATCCC
Neg_GeCKO_765	TAGTCCTTAGGGTGGGCTGA
Neg_GeCKO_766	CGTGTGTGGGTAAACGGAAA
Neg_GeCKO_767	CTCTGTGAGATGTCCCGAAA
Neg_GeCKO_768	TTGGGGATTAACCCAGAGCC
Neg_GeCKO_769	TTCCTAGAGTTGGCAGACGC
Neg_GeCKO_77	GTAGACGTCGTGAGCTTCAC
Neg_GeCKO_770	GACAGTGAAATTAGCTCCCA
Neg_GeCKO_771	TGTTCTACTTTCGAAGTTAA
Neg_GeCKO_772	GGGAGTTGATTGTTTCGAGA
Neg_GeCKO_773	TAGAATTTGACCAAAGGCAC
Neg_GeCKO_774	CTTCTAGCTGGTTCATTGCT
Neg_GeCKO_775	CCCTGTGAAGGAGGCGTAAG
Neg_GeCKO_776	CAAGCATTTAGACACCTGTC
Neg_GeCKO_777	GTGTATGAATGTTAATTCCG
Neg_GeCKO_778	CGGCCAAAGAATTAGAAGTT
Neg_GeCKO_779	GGACTTTAGTTCCAGTGGTT
Neg_GeCKO_78	TCGCGGACATAGGGCTCTAA
Neg_GeCKO_780	TGAACGGTGAAGAGATAGGG
Neg_GeCKO_781	AGCCGGCTTGTGACAGTGAA
Neg_GeCKO_782	CCAAAAAGATGAATATCTCG
Neg_GeCKO_783	GATTCATACTAAACACTCTA
Neg_GeCKO_784	ATTTATAAACACAGGGTCGC
Neg_GeCKO_785	AGGGGCAGGGCTATCTTATG
Neg_GeCKO_786	GTAAACTTTGTCTGGAGTAT
Neg_GeCKO_787	GAATAGATTTGTCAGTTAGG
Neg_GeCKO_788	AGTTCTGTTCGATAGATGCC
Neg_GeCKO_789	GTGATAATGATGTATTCTCG
Neg_GeCKO_79	AGCGCAGATAGCGCGTATCA
Neg_GeCKO_790	TCCTCACCTAAAGTGCAATA
Neg_GeCKO_791	GTTTTCAGTTGCCCAACAGC
Neg_GeCKO_792	CGCGCAGAAGGCAAGCAGGG
Neg_GeCKO_793	ATTTTCGAAAGCTTAGGCCA
Neg_GeCKO_794	GTTTCGAAACTTGAAGTAAG
Neg_GeCKO_795	CTAACATGAGTACATAGATA
Neg_GeCKO_796	ACCACTAATGAGATTCTTGT
Neg_GeCKO_797	AGGATGCTGAACAAGTACGT
Neg_GeCKO_798	TTCTAAGCGCCCTGGGGACA
Neg_GeCKO_799	ATCCTAGGTACAAAAGGACG
Neg_GeCKO_8	GGGCCCGCATAGGATATCGC
Neg_GeCKO_80	GTTCGCTTCGTAACGAGGAA
Neg_GeCKO_800	GTATTACTGATATTGGTGGG
Neg_GeCKO_801	CTCATGAGTCGTTTCTTTCA
Neg_GeCKO_802	CTTAAGGCGAGAAAAATTAG
Neg_GeCKO_803	TTAACGCCTTATTTTTATGT
Neg_GeCKO_804	GGATGTTTCTGTGCGCACAT
Neg_GeCKO_805	TCAGTATCGGCTGCTGGTAA
Neg_GeCKO_806	GTCAAGAGATTATGAGATTC
Neg_GeCKO_807	CAGACCCAGTAAAACCACCA
Neg_GeCKO_808	CACCATAGAACCTGAAATAC
Neg_GeCKO_809	AGCTGAAAATATACGTATTC
Neg_GeCKO_81	GACCCCCGATAACTTTTGAC
Neg_GeCKO_810	TCTATTTTGTCTGCGCAGAA
Neg_GeCKO_811	GCTTTTTCCAGCGAGAGCAA
Neg_GeCKO_812	GGATTAATTCGCTAAATGAT
Neg_GeCKO_813	ATAAGCTACTCTGAGTTCCT
Neg_GeCKO_814	GTGAACTGCAATCTTATTAT
Neg_GeCKO_815	GATTTTAGCTTAGGTCTTAC
Neg_GeCKO_816	ATGCAAGACAGCCTCCCAGC
Neg_GeCKO_817	TGTAGTCTGGGGTAGACTCC
Neg_GeCKO_818	GACGAGGGCGGCAGAGCAGT
Neg_GeCKO_819	GGACCAACTCCCCTGCCCAC
Neg_GeCKO_82	ACGTCCATACTGTCGGCTAC
Neg_GeCKO_820	GGGGCAGGGACCGAGTATCC
Neg_GeCKO_821	CTGCCCTCTTGAAATAGCCA
Neg_GeCKO_822	AGGGATCGTTAGGAAGGGAA
Neg_GeCKO_823	TGAGTCTTACTAGGTCCTGT
Neg_GeCKO_824	CACATAACATGAGGTATCAG
Neg_GeCKO_825	CTTCCTGCGTGGCTTTAAAC
Neg_GeCKO_826	ATAGCTAAAGTTGATGTGTA
Neg_GeCKO_827	CTTAACACTTTAGTGCGTCA
Neg_GeCKO_828	CTTATTACTCCAGTATAAGA
Neg_GeCKO_829	AGGGAAACCTCTATGGGTAA
Neg_GeCKO_83	GTACCATTGCCGGCTCCCTA
Neg_GeCKO_830	AAGCCATTGTATAACTCCAG
Neg_GeCKO_831	TGCAAGGACCTGGTATGAAC
Neg_GeCKO_832	CCAGAGCCTTGGTTTATATC
Neg_GeCKO_833	GCTGGAGAGACAATTCTACT
Neg_GeCKO_834	TGTAGATATAGGGTGTCTAC
Neg_GeCKO_835	GCGAATGCCTGAAAGTATAA
Neg_GeCKO_836	ATACTCTCACAGGTACATAA
Neg_GeCKO_837	ATGGAAGAGCGTCATGACTT
Neg_GeCKO_838	TTGCAATGCTGCTATAGAAG
Neg_GeCKO_839	AAGGCAATTTACTGGATCCT
Neg_GeCKO_84	TGGTTCCGTAGGTCGGTATA
Neg_GeCKO_840	CTGCACTGTGGAGACGCCCG
Neg_GeCKO_841	AGGACACAGGATACGCAGCT
Neg_GeCKO_842	TGCTCACTCCACTCCTCAAC
Neg_GeCKO_843	GGAGAGGAAAATCGGCACAG
Neg_GeCKO_844	GCACAAAACCAGCAATGGTC
Neg_GeCKO_845	AGCTTAATGTGCAGGTCAGA
Neg_GeCKO_846	ACTAGGGCAGTGTGTCTGCA
Neg_GeCKO_847	CTCCCAGTACCAGTCAGTTC
Neg_GeCKO_848	TCAGGATCAGGGTGTATGGC
Neg_GeCKO_849	GGGAGGTGGCTTTAGGTTTT
Neg_GeCKO_85	TCTGGCTTGACACGACCGTT
Neg_GeCKO_850	AGGATGGATTGAGCAGCGGT
Neg_GeCKO_851	AACAGGAAACGTGACTAAAG
Neg_GeCKO_852	CTGGCTTATTAGCTATAAAG
Neg_GeCKO_853	GCAAAAGTGGCATAAAACCG
Neg_GeCKO_854	ACAAAAAACTACGGTGATTA
Neg_GeCKO_855	TGACACATTGGCTGGGTGTT
Neg_GeCKO_856	ATGATATCTGACATGCAGCG
Neg_GeCKO_857	AGAATGCCATCTAGTTAGTA
Neg_GeCKO_858	TTGGCCTGGAATTTAGGATC
Neg_GeCKO_859	TCTGAAAAATAGGCCCAACC
Neg_GeCKO_86	CGCTAGGTCCGGTAAGTGCG
Neg_GeCKO_860	GTGGGGTAGTCTGTTGCTCG
Neg_GeCKO_861	GAGCAGCTGTCAGGTCTTGT
Neg_GeCKO_862	CATGGCATAAGTATAAGACA
Neg_GeCKO_863	GCCTGGGTTTTGGTGCATAC
Neg_GeCKO_864	GCACTTTGTTTGGCCTACTG
Neg_GeCKO_865	TAGATCGAGTTTATTTTCCT
Neg_GeCKO_866	CTCTTTTGAGATTGACAAGT
Neg_GeCKO_867	TTGCAGCCACTCCTGCAATA
Neg_GeCKO_868	GAACTCAACCAGAGGGCCAA
Neg_GeCKO_869	TATCTCTGCATAAAAGTGCC
Neg_GeCKO_87	AGCACGTAATGTCCGTGGAT
Neg_GeCKO_870	CAAATGCCATTTAGGTTATC
Neg_GeCKO_871	GCACGAGGTGAACAGCCGCT
Neg_GeCKO_872	GTGAGATGCACCTTTTGGCC
Neg_GeCKO_873	TGGCAGTGGAAAATCTGCGG
Neg_GeCKO_874	TCATGCTTGCTTGGGCAAAA
Neg_GeCKO_875	TGACCTCTGAGGAATTCACA
Neg_GeCKO_876	AATTTATCGTCAACATTAAT
Neg_GeCKO_877	AAACTGTAGTGCAGGGTCAG
Neg_GeCKO_878	AAGTGTGTGCATAGCAGGGT
Neg_GeCKO_879	GCAATGCAATCGCAGGAGCA
Neg_GeCKO_88	AAGGCGCGCGAATGTGGCAG
Neg_GeCKO_880	GGTCCCTCTGGCTGGGTTAA
Neg_GeCKO_881	GAGCTTAGCAAAGGGTTGGG
Neg_GeCKO_882	AACTACAAGTAAAAGTATCG
Neg_GeCKO_883	TTATATGGTTTTAAACGGCT
Neg_GeCKO_884	GAGGACCTTAAGGTGACATG
Neg_GeCKO_885	CTTAAGTCATGAGCAAAGAT
Neg_GeCKO_886	AAACGAGATCGAGAAAGGTA
Neg_GeCKO_887	ATCTGCCATGGCGTCCTGGC
Neg_GeCKO_888	AGTGCTACTGAAACTTGCCT
Neg_GeCKO_889	AGTGTTTGAAAAAAGGGCGG
Neg_GeCKO_89	ACTGCGGAGCGCCCAATATC
Neg_GeCKO_890	CCAGAAAGCCTCTCCATTAC
Neg_GeCKO_891	TCCTGCCAAGAAACACCCTT
Neg_GeCKO_892	GACCTTCATTGAAGAAAAGC
Neg_GeCKO_893	GAGATGATAACTTAATTTGT
Neg_GeCKO_894	AAGAGATCACATCTAGGCCA
Neg_GeCKO_895	GTTAGGAATAAAAGCTTTGA
Neg_GeCKO_896	ACTTCCCACTTCTTAGGTTG
Neg_GeCKO_897	CCATTCACAATCCCACTACA
Neg_GeCKO_898	TGTTTTGCATGTTGCATAGG
Neg_GeCKO_899	TAAGCCTCATGAAGGAGGGG
Neg_GeCKO_9	TAGACAACCGCGGAGAATGC
Neg_GeCKO_90	CGTCGAGTGCTCGAACTCCA
Neg_GeCKO_900	GGTACTGGAAGTCCGAAACC
Neg_GeCKO_901	AAATAATATGCATCTCTCGA
Neg_GeCKO_902	AGCTGGACTCTGTAGAAATC
Neg_GeCKO_903	CCTAACCCCTGGCCAGGAAG
Neg_GeCKO_904	AACCACGGCATTGAGAGGTG
Neg_GeCKO_905	AGTACCCCTAGGTATGGGGA
Neg_GeCKO_906	CCTCTGGAAGGACACTTCTG
Neg_GeCKO_907	TCTACCTATTGTGGAATTTG
Neg_GeCKO_908	TACATGGTATAGTGTTTATT
Neg_GeCKO_909	TGCAACCTTCCTTTTCAGGA
Neg_GeCKO_91	TCGCAGCGGCGTGGGATCGG
Neg_GeCKO_910	GGGCAGAAGTTGCTGTCCTG
Neg_GeCKO_911	AGGAGTGTTATGAAAAGGCT
Neg_GeCKO_912	ACAGGTTCTTATTCATTGAC
Neg_GeCKO_913	ATCCATGTGGTTACAATATT
Neg_GeCKO_914	GGGGAAACAAGTAGGCTTTG
Neg_GeCKO_915	TCAAGGAGCCTTATTTCTTG
Neg_GeCKO_916	AGAGGGATTGGGAGCTTGAC
Neg_GeCKO_917	ACTGCTGCTGACATCTCTTA
Neg_GeCKO_918	TGGAGTGCACGCGAAAAGAA
Neg_GeCKO_919	ATCTACAATCCAGCCCTCTA
Neg_GeCKO_92	ATCTGTCCTAATTCGGATCG
Neg_GeCKO_920	TTTTACCTTGTTCACATGGA
Neg_GeCKO_921	GTAAATTAATGTAACTACCG
Neg_GeCKO_922	ATTAGGCCTTTTTCTTAACT
Neg_GeCKO_923	TCCCTGCATTCATGGTTTTA
Neg_GeCKO_924	TGTGAAAGTTTATGGTGTTA
Neg_GeCKO_925	GGAGTATAAAAAAGTGGTGT
Neg_GeCKO_926	GCTTTCAATTGCAAAAATAC
Neg_GeCKO_927	ACTCAGCCATTTTATTAGAA
Neg_GeCKO_928	AAAGACTTGCTCCAAAACAC
Neg_GeCKO_929	GGCTCTGGGGCTCACGGACG
Neg_GeCKO_93	TGCGGCGTAATGCTTGAAAG
Neg_GeCKO_930	ACCCATGAGTTAAGTTTTCT
Neg_GeCKO_931	TAAATTCAGACCACAGCTAA
Neg_GeCKO_932	GGAATGTCCTAGGTTACTGA
Neg_GeCKO_933	CTCTCTCCTACCTGTCCACC
Neg_GeCKO_934	CCTTGAAATCAAATCAAACC
Neg_GeCKO_935	AGGGTCAGTCTGTCCTTTTT
Neg_GeCKO_936	CCTCTCCCAATCTACAGCTC
Neg_GeCKO_937	GCAGCGAGATAACTTGACTC
Neg_GeCKO_938	ATCAAAGTGTCTGACTTATT
Neg_GeCKO_939	CAAATACAATTACTTATAGC
Neg_GeCKO_94	CGAACTTAATCCCGTGGCAA
Neg_GeCKO_940	CAAAATCTAGCAATTTTTGG
Neg_GeCKO_941	CTAAAATTTTTGCGTGTTTG
Neg_GeCKO_942	GCAAGGTCATGAAACCAAGC
Neg_GeCKO_943	CGTGTAAAAATACCTTTCTA
Neg_GeCKO_944	CTGTGTTGCTCCCCTCCCCT
Neg_GeCKO_945	GTCTTCACAGGGTGCAACGA
Neg_GeCKO_946	GCAAATTCAGACAGCTAATT
Neg_GeCKO_947	TTCCATTGGCTGGAATCTGA
Neg_GeCKO_948	CTGAAGGTGTCTGGCAGAGC
Neg_GeCKO_949	GTAATTTTATGAGTTAAGTG
Neg_GeCKO_95	GCCGTGTTGCTGGATACGCC
Neg_GeCKO_950	TAGTACATGTGTGGTATTTA
Neg_GeCKO_951	AGTGTGGAAAAGCTAACAGA
Neg_GeCKO_952	TGCCCCACCCCAGTGCTCAG
Neg_GeCKO_953	GATCCTTCTCTTTTTGGTTT
Neg_GeCKO_954	TCGAGAGGAAAAACACACTG
Neg_GeCKO_955	AATTTAAGCTTCGTAACTGG
Neg_GeCKO_956	ACTGCTGCTGTCTTCTAAAT
Neg_GeCKO_957	GATCCAGCAATATTTCTTAA
Neg_GeCKO_958	CCAGCCAAGAATCCAGCCCC
Neg_GeCKO_959	CAGAGACAATGACATGTAGA
Neg_GeCKO_96	TACCCTCCGGATACGGACTG
Neg_GeCKO_960	GGAACGAGGCAGTGACAGGG
Neg_GeCKO_961	GCTAGTTTCTGTTAGCTCCT
Neg_GeCKO_962	TTTGGCAGTACCTTTTATTA
Neg_GeCKO_963	AAAATAGCAGTAAACTCAAC
Neg_GeCKO_964	TCAGCAAAGGACGAAACAAA
Neg_GeCKO_965	AAGGACTGGAATATGGAGAG
Neg_GeCKO_966	AGTTCCCAGAAATATATTGC
Neg_GeCKO_967	GTTTAAAGAAAGGGGCTAAG
Neg_GeCKO_968	CCAGTTGCTCTGGGGGAACA
Neg_GeCKO_969	GAAAGGCATAGTGAGAATGG
Neg_GeCKO_97	CCGTTGGACTATGGCGGGTC
Neg_GeCKO_970	ACTATTTAATATTGGTAAGT
Neg_GeCKO_971	TCATCTTACATCTGGGAGAC
Neg_GeCKO_972	CAAGTTTTCTGAAAGGCAAT
Neg_GeCKO_973	AAAGATATAGCAAATTATGG
Neg_GeCKO_974	ACCTTACAATAAGTTATATT
Neg_GeCKO_975	TGTCATGCGTCACTTAGTGC
Neg_GeCKO_976	AAGTGACAGATGGGCAGGCG
Neg_GeCKO_977	GGTCTCTGTACGGGCCGCCC
Neg_GeCKO_978	TTGGATATTAATTAGACATG
Neg_GeCKO_979	GACTTCTAGAATATAAAAGA
Neg_GeCKO_98	GTACGGGGCGATCATCCACA
Neg_GeCKO_980	TTCCTAAGATTTTTAAGACT
Neg_GeCKO_981	TAGTGGAAAATGAATATTGA
Neg_GeCKO_982	TTTTTAATACAAGGTAATCT
Neg_GeCKO_983	CGGGATGCAGCTGGAGAGGA
Neg_GeCKO_984	TATAACGGTAATGGGATTCC
Neg_GeCKO_985	AAGAAGAATTGGGGATGATG
Neg_GeCKO_986	CAAAGGGGGAAGTGCAGGGA
Neg_GeCKO_987	TAAAGCAGAAGAATATACAG
Neg_GeCKO_988	ATTTAGTAGACATTGGGTCT
Neg_GeCKO_989	GAGAAGGATGGAAATTAGAA
Neg_GeCKO_99	AAGAGTAGTAGACGCCCGGG
Neg_GeCKO_990	GTGTAGTCCTAGCCATGGGG
Neg_GeCKO_991	GCCCCGCCGCCCTCCCCTCC
Neg_GeCKO_992	AAAGAAAGAGGAATAGTAGC
Neg_GeCKO_993	GAGAAGTGGGGAGCCATTGG
Neg_GeCKO_994	AGAAGAAAAAAATGTCTACG
Neg_GeCKO_995	GACTGAAATCCAAGGACTGT
Neg_GeCKO_996	ATATTTTATGACATAAAAAT
Neg_GeCKO_997	TAAACAAAAAGGAAATAGTT
Neg_GeCKO_998	TTTCCCATGATCATTTAGTG
Neg_GeCKO_999	CTGAGTGAAAAATAAAAGTT
neg01	GTAGCGAACGTGTCCGGCGT
neg02	GACCGGAACGATCTCGCGTA
neg03	GGCAGTCGTTCGGTTGATAT
neg04	GCTTGAGCACATACGCGAAT
neg05	GTGGTAGAATAACGTATTAC
neg06	GTCATACATGGATAAGGCTA
neg07	GATACACGAAGCATCACTAG
neg08	GAACGTTGGCACTACTTCAC
neg09	GATCCATGTAATGCGTTCGA
neg10	GTCGTGAAGTGCATTCGATC
neg100	GAGCACTTGCATGAGGCGGT
neg11	GTTCGACTCGCGTGACCGTA
neg12	GAATCTACCGCAGCGGTTCG
neg13	GAAGTGACGTCGATTCGATA
neg14	GCGGTGTATGACAACCGCCG
neg15	GTACCGCGCCTGAAGTTCGC
neg16	GCAGCTCGTGTGTCGTACTC
neg17	GCGCCTTAAGAGTACTCATC
neg18	GAGTGTCGTCGTTGCTCCTA
neg19	GCAGCTCGACCTCAAGCCGT
neg20	GTATCCTGACCTACGCGCTG
neg21	GTGTATCTCAGCACGCTAAC
neg22	GTCGTCATACAACGGCAACG
neg23	GTCGTGCGCTTCCGGCGGTA
neg24	GCGGTCCTCAGTAAGCGCGT
neg25	GCTCTGCTGCGGAAGGATTC
neg26	GTCTTCCGCCGCTCAAGTTA
neg27	GCATGGAGGAGCGTCGCAGA
neg28	GTAGCGCGCGTAGGAGTGGC
neg29	GATCACCTGCATTCGTACAC
neg30	GCACACCTAGATATCGAATG
neg31	GTTGATCAACGCGCTTCGCG
neg32	GCGTCTCACTCACTCCATCG
neg33	GCCGACCAACGTCAGCGGTA
neg34	GGATACGGTGCGTCAATCTA
neg35	GAATCCAGTGGCGGCGACAA
neg36	GCACTGTCAGTGCAACGATA
neg37	GCGATCCTCAAGTATGCTCA
neg38	GCTAATATCGACACGGCCGC
neg39	GGAGATGCATCGAAGTCGAT
neg40	GGATGCACTCCATCTCGTCT
neg41	GTGCCGAGTAATAACGCGAG
neg42	GAGATTCCGATGTAACGTAC
neg43	GTCGTCACGAGCAGGATTGC
neg44	GCGTTAGTCACTTAGCTCGA
neg45	GTTCACACGGTGTCGGATAG
neg46	GGATAGGTGACCTTAGTACG
neg47	GTATGAGTCAAGCTAATGCG
neg48	GCAACTATTGGAATACGTGA
neg49	GTTACCTTCGCTCGTCTATA
neg50	GTACCGAGCACCACAGGCCG
neg51	GTCAGCCATCGGATAGAGAT
neg52	GTACGGCACTCCTAGCCGCT
neg53	GGTCCTGTCGTATGCTTGCA
neg54	GCCGCAATATATGCGGTAAG
neg55	GCGCACGTATAATCCTGCGT
neg56	GTGCACAACACGATCCACGA
neg57	GCACAATGTTGACGTAAGTG
neg58	GTAAGATGCTGCTCACCGTG
neg59	GTCGGTGATCCAACGTATCG
neg60	GAGCTAGTAGGACGCAAGAC
neg61	GTACGTGGAAGCTTGTGGCC
neg62	GTCTTCCGGAAGCGTGTGTT
neg63	GAGAACTGCCAGTTCTCGAT
neg64	GCCATTCGGCGCGGCACTTC
neg65	GCACACGACCAATCCGCTTC
neg66	GAGGTGATCGATTAAGTACA
neg67	GTCACTCGCAGACGCCTAAC
neg68	GCGCTACGGAATCATACGTT
neg69	GGTAGGACCTCACGGCGCGC
neg70	GAACTGCATCTTGTTGTAGT
neg71	GATCCTGATCCGGCGGCGCG
neg72	GGTATGCGCGATCCTGAGTT
neg73	GCGGAGCTAGAGAGCGGTCA
neg74	GAATGGCAATTACGGCTGAT
neg75	GTATGGTGAGTAGTCGCTTG
neg76	GTGTAATTGCGTCTAGTCGG
neg77	GGTCCTGGCGAGGAGCCTTG
neg78	GAAGATAAGTCGCTGTCTCG
neg79	GTAGCGAAGACTTGCCGACG
neg80	GTCGGCGTTCTGTTGTGACT
neg81	GAGGCAAGCCGTTAGGTGTA
neg82	GCGGATCCAGATCTCATTCG
neg83	GGAACATAGGAGCACGTAGT
neg84	GTCATCATTATGGCGTAAGG
neg85	GCGACTAGCGCCATGAGCGG
neg86	GGCGAAGTTCGACATGACAC
neg87	GCTGTCGTGTGGAGGCTATG
neg88	GCGGAGAGCATTGACCTCAT
neg89	GACTAATGGACCAAGTCAGT
neg90	GCGGATTAGAGGTAATGCGG
neg91	GCCGACGGCAATCAGTACGC
neg92	GTAACCTCTCGAGCGATAGA
neg93	GACTTGTATGTGGCTTACGG
neg94	GTCACTGTGGTCGAACATGT
neg95	GTACTCCAATCCGCGATGAC
neg96	GCGTTGGCACGATGTTACGG
neg97	GAACCAGCCGGCTAGTATGA
neg98	GTATACTAGCTAACCACACG
neg99	GAATCGGAATAGTTGATTCG
NM_001190879_AAAGATTATAGAGAAGTGTT_171	AAAGATTATAGAGAAGTGTT
NM_001190879_AAGACCAATAACTGCTATTG_187	AAGACCAATAACTGCTATTG
NM_001190879_AAGCCCATGGAAAGAACTTC_389	AAGCCCATGGAAAGAACTTC
NM_001190879_AAGCTTCCAGAAGAAATGAA_137	AAGCTTCCAGAAGAAATGAA
NM_001190879_AATCACAAGGCAGTTAAATC_117	AATCACAAGGCAGTTAAATC
NM_001190879_AATTCATTAAGTGTATCTGC_214	AATTCATTAAGTGTATCTGC
NM_001190879_ACAAGGTTTTTGCTGAGAAG_246	ACAAGGTTTTTGCTGAGAAG
NM_001190879_ACATTTAAATGACATCTATG_337	ACATTTAAATGACATCTATG
NM_001190879_ACCTGCAGAGTTTCCAGACA_240	ACCTGCAGAGTTTCCAGACA
NM_001190879_ACCTTGTCTGGAAACTCTGC_239	ACCTTGTCTGGAAACTCTGC
NM_001190879_ACTCCAAATAGGTTACTATG_35	ACTCCAAATAGGTTACTATG
NM_001190879_ACTGCCTTGTGATTTCCTTT_112	ACTGCCTTGTGATTTCCTTT
NM_001190879_AGAGCCATTTAATTTTCAAA_345	AGAGCCATTTAATTTTCAAA
NM_001190879_AGATCTACGGCAGTCATAAA_297	AGATCTACGGCAGTCATAAA
NM_001190879_AGCAAGCCAACTGTGTAGCA_308	AGCAAGCCAACTGTGTAGCA
NM_001190879_AGGTTTTTCAAAATTATAAA_365	AGGTTTTTCAAAATTATAAA
NM_001190879_AGTAACTCTGTCCTTATTAT_63	AGTAACTCTGTCCTTATTAT
NM_001190879_AGTCCACATAGTAACCTATT_35	AGTCCACATAGTAACCTATT
NM_001190879_AGTTTCAGAAGTTTGTTCAA_356	AGTTTCAGAAGTTTGTTCAA
NM_001190879_ATACACTTAATGAATTCATT_218	ATACACTTAATGAATTCATT
NM_001190879_ATAGCATGTGTAATGACCGC_277	ATAGCATGTGTAATGACCGC
NM_001190879_ATAGTTTTTCCTGATCCTCG_70	ATAGTTTTTCCTGATCCTCG
NM_001190879_ATCCTCGGGGTCCGATAATA_65	ATCCTCGGGGTCCGATAATA
NM_001190879_ATTAGAATTAATAAAGCCCA_385	ATTAGAATTAATAAAGCCCA
NM_001190879_ATTATCGGACCCCGAGGATC_68	ATTATCGGACCCCGAGGATC
NM_001190879_ATTGTACTTGCACTCCAAAT_38	ATTGTACTTGCACTCCAAAT
NM_001190879_ATTTCCTGAAGTTCTTTCCA_389	ATTTCCTGAAGTTCTTTCCA
NM_001190879_CAATGACAAAATCGCCCTAA_109	CAATGACAAAATCGCCCTAA
NM_001190879_CAGACCCCAATAGCAGTTAT_187	CAGACCCCAATAGCAGTTAT
NM_001190879_CATAGTTTTTCCTGATCCTC_70	CATAGTTTTTCCTGATCCTC
NM_001190879_CATCTAATATGAAGATCACT_154	CATCTAATATGAAGATCACT
NM_001190879_CCAAAAGCAGTTTCATCAGC_401	CCAAAAGCAGTTTCATCAGC
NM_001190879_CCAACTGTCCTACAGATGTG_423	CCAACTGTCCTACAGATGTG
NM_001190879_CCAGCTGATGAAACTGCTTT_403	CCAGCTGATGAAACTGCTTT
NM_001190879_CCTCACATCTGTAGGACAGT_421	CCTCACATCTGTAGGACAGT
NM_001190879_CTCACATCTGTAGGACAGTT_421	CTCACATCTGTAGGACAGTT
NM_001190879_CTGAAAAGAACTGCTCTCCA_54	CTGAAAAGAACTGCTCTCCA
NM_001190879_CTGCCTTGTGATTTCCTTTA_112	CTGCCTTGTGATTTCCTTTA
NM_001190879_GATCTACGGCAGTCATAAAT_296	GATCTACGGCAGTCATAAAT
NM_001190879_GCCCACTGCCTCACATCTGT_424	GCCCACTGCCTCACATCTGT
NM_001190879_GCTTGCTTCCATTAGATCTA_301	GCTTGCTTCCATTAGATCTA
NM_001190879_GGACAGAGTTACTCTCTCCA_58	GGACAGAGTTACTCTCTCCA
NM_001190879_GGGCAACATCCTCACTAAGC_432	GGGCAACATCCTCACTAAGC
NM_001190879_GTAAGACCAATAACTGCTAT_188	GTAAGACCAATAACTGCTAT
NM_001190879_GTCCTACAGATGTGAGGCAG_425	GTCCTACAGATGTGAGGCAG
NM_001190879_GTCCTTATTATCGGACCCCG_66	GTCCTTATTATCGGACCCCG
NM_001190879_TAAGACCAATAACTGCTATT_187	TAAGACCAATAACTGCTATT
NM_001190879_TAGACCATTTGAAAATTAAA_345	TAGACCATTTGAAAATTAAA
NM_001190879_TATGACTGCCGTAGATCTAA_300	TATGACTGCCGTAGATCTAA
NM_001190879_TCAATATCAGCAAAAACCTG_274	TCAATATCAGCAAAAACCTG
NM_001190879_TCACTGGGCAACTGCTAGTT_149	TCACTGGGCAACTGCTAGTT
NM_001190879_TCATCTAATATGAAGATCAC_155	TCATCTAATATGAAGATCAC
NM_001190879_TCATGCTTTGAAAGAACTCA_82	TCATGCTTTGAAAGAACTCA
NM_001190879_TCCTACAGATGTGAGGCAGT_425	TCCTACAGATGTGAGGCAGT
NM_001190879_TCGAGTCCATGCTACACAGT_308	TCGAGTCCATGCTACACAGT
NM_001190879_TCGCCCTAAAGGAAATCACA_113	TCGCCCTAAAGGAAATCACA
NM_001190879_TGAAAACCTTTCATTTCTTC_137	TGAAAACCTTTCATTTCTTC
NM_001190879_TGAAGTCAAGATTTTCTCAC_210	TGAAGTCAAGATTTTCTCAC
NM_001190879_TTAAATATTTTAACATACTG_226	TTAAATATTTTAACATACTG
NM_001190879_TTAAATCTGGAAAATGTAGT_121	TTAAATCTGGAAAATGTAGT
NM_001190879_TTCTCAGCAAAAACCTTGTC_243	TTCTCAGCAAAAACCTTGTC
NM_001190879_TTTCCTGAAGTTCTTTCCAT_389	TTTCCTGAAGTTCTTTCCAT
NM_001254_AAAACATATGACTGCAGAGA_272	AAAACATATGACTGCAGAGA
NM_001254_AAAATCAAAGAGGTCACTCT_479	AAAATCAAAGAGGTCACTCT
NM_001254_AAACATATGACTGCAGAGAA_272	AAACATATGACTGCAGAGAA
NM_001254_AAAGGGAGATGGATGTCATC_180	AAAGGGAGATGGATGTCATC
NM_001254_AAAGTGACAAACACTCTGAC_504	AAAGTGACAAACACTCTGAC
NM_001254_AAATCAAAGAGGTCACTCTG_480	AAATCAAAGAGGTCACTCTG
NM_001254_AAATCTCCTGAGCAATAGCT_245	AAATCTCCTGAGCAATAGCT
NM_001254_AACTGATTGTAGCCTGTGCC_8	AACTGATTGTAGCCTGTGCC
NM_001254_AAGAGGTATCCAGGCCAGCT_257	AAGAGGTATCCAGGCCAGCT
NM_001254_AAGCAAGGCAAGAAAGAGAA_80	AAGCAAGGCAAGAAAGAGAA
NM_001254_AAGCCCTGCCTCTCAGCCCC_53	AAGCCCTGCCTCTCAGCCCC
NM_001254_AAGTGAGAATTGCTTAGCCA_306	AAGTGAGAATTGCTTAGCCA
NM_001254_AATAGCTGGGAATACAGCCT_241	AATAGCTGGGAATACAGCCT
NM_001254_AATAGTGACTATCTGATTTC_349	AATAGTGACTATCTGATTTC
NM_001254_AATTCTATCTGTGAGATCCA_321	AATTCTATCTGTGAGATCCA
NM_001254_ACACGCTATTTGAATGGCCA_302	ACACGCTATTTGAATGGCCA
NM_001254_ACAGTGGTTTGAGAATAGTC_409	ACAGTGGTTTGAGAATAGTC
NM_001254_ACCAAGATCTTCTGCTGAAG_460	ACCAAGATCTTCTGCTGAAG
NM_001254_ACTATCTGATTTCTGGTATA_347	ACTATCTGATTTCTGGTATA
NM_001254_ACTGATTGTAGCCTGTGCCT_8	ACTGATTGTAGCCTGTGCCT
NM_001254_AGACGTTTCCTGGGGCTGAG_54	AGACGTTTCCTGGGGCTGAG
NM_001254_AGAGGCAGGGCTTTTACACG_48	AGAGGCAGGGCTTTTACACG
NM_001254_AGGAATCTTGTGCTCCTTCT_451	AGGAATCTTGTGCTCCTTCT
NM_001254_AGGAGATGTTCGCAAAGCAC_388	AGGAGATGTTCGCAAAGCAC
NM_001254_AGGATGACCTTGAGCCAAGA_448	AGGATGACCTTGAGCCAAGA
NM_001254_AGTCTGTCGCAAACAGCAGG_495	AGTCTGTCGCAAACAGCAGG
NM_001254_ATAGCGTGTACAATACATCC_295	ATAGCGTGTACAATACATCC
NM_001254_ATCAACTTCTGAGATGACTT_437	ATCAACTTCTGAGATGACTT
NM_001254_ATCGGCTGCCTGCCAGGGAA_174	ATCGGCTGCCTGCCAGGGAA
NM_001254_ATCTGATTTCTGGTATAAGG_346	ATCTGATTTCTGGTATAAGG
NM_001254_ATGGATCAACTGGACAGCAA_289	ATGGATCAACTGGACAGCAA
NM_001254_ATGGCTAAGCAATTCTCACT_308	ATGGCTAAGCAATTCTCACT
NM_001254_ATGTCATCAGGAATTTCTTG_184	ATGTCATCAGGAATTTCTTG
NM_001254_ATTGGAAATATCTTAGCTAC_554	ATTGGAAATATCTTAGCTAC
NM_001254_ATTGGACGAGATGGATCAAC_286	ATTGGACGAGATGGATCAAC
NM_001254_CAAACAGCAGGTGGCGGCTG_498	CAAACAGCAGGTGGCGGCTG
NM_001254_CAAATCTCCTGAGCAATAGC_246	CAAATCTCCTGAGCAATAGC
NM_001254_CAAGTCATCTCAGAAGTTGA_439	CAAGTCATCTCAGAAGTTGA
NM_001254_CAATAGCTGGGAATACAGCC_241	CAATAGCTGGGAATACAGCC
NM_001254_CACATCTGTGGGAAAAAAGC_192	CACATCTGTGGGAAAAAAGC
NM_001254_CAGAGTGTTTGTCACTTTCA_508	CAGAGTGTTTGTCACTTTCA
NM_001254_CAGCTGGGAAGGACATGATG_262	CAGCTGGGAAGGACATGATG
NM_001254_CAGGAGCACCAGAAAGGTAA_199	CAGGAGCACCAGAAAGGTAA
NM_001254_CAGGCAGTTGAAAATCAAAG_476	CAGGCAGTTGAAAATCAAAG
NM_001254_CAGGCAGTTTTTCCAGTTCC_206	CAGGCAGTTTTTCCAGTTCC
NM_001254_CAGTTCCAGGAGCACCAGAA_201	CAGTTCCAGGAGCACCAGAA
NM_001254_CATCAACTTCTGAGATGACT_437	CATCAACTTCTGAGATGACT
NM_001254_CATGCAGATTCTTTCTTCAG_141	CATGCAGATTCTTTCTTCAG
NM_001254_CATGTCCTTCCCAGCTGGCC_258	CATGTCCTTCCCAGCTGGCC
NM_001254_CATGTCCTTGAGGACTGCCC_237	CATGTCCTTGAGGACTGCCC
NM_001254_CCAACCCTCTTGGGAATCAG_425	CCAACCCTCTTGGGAATCAG
NM_001254_CCAAGATCTTCTGCTGAAGA_459	CCAAGATCTTCTGCTGAAGA
NM_001254_CCCAGATCGGCTGCCTGCCA_172	CCCAGATCGGCTGCCTGCCA
NM_001254_CCCTCACTCACATACACTTA_89	CCCTCACTCACATACACTTA
NM_001254_CCCTCTTCAGCAGAAGATCT_461	CCCTCTTCAGCAGAAGATCT
NM_001254_CCCTGGCAGGCAGCCGATCT_170	CCCTGGCAGGCAGCCGATCT
NM_001254_CCCTTAAGTGTATGTGAGTG_88	CCCTTAAGTGTATGTGAGTG
NM_001254_CCTCACTCACATACACTTAA_89	CCTCACTCACATACACTTAA
NM_001254_CCTCTGATTCCCAAGAGGGT_426	CCTCTGATTCCCAAGAGGGT
NM_001254_CCTTAAGTGTATGTGAGTGA_87	CCTTAAGTGTATGTGAGTGA
NM_001254_CCTTGCTTTGGTGGAGAACA_74	CCTTGCTTTGGTGGAGAACA
NM_001254_CCTTGTTCTCCACCAAAGCA_75	CCTTGTTCTCCACCAAAGCA
NM_001254_CGCAAAGTCTCTGCTGTTTC_381	CGCAAAGTCTCTGCTGTTTC
NM_001254_CTACAATCAGTTTTCCAAAA_14	CTACAATCAGTTTTCCAAAA
NM_001254_CTCATCATGTCCTTCCCAGC_260	CTCATCATGTCCTTCCCAGC
NM_001254_CTGAAACAGCAGAGACTTTG_379	CTGAAACAGCAGAGACTTTG
NM_001254_CTGAAAGATAAAGCTTTAAT_548	CTGAAAGATAAAGCTTTAAT
NM_001254_CTGAAGAAAGTATTTTGTTT_118	CTGAAGAAAGTATTTTGTTT
NM_001254_CTGAGCCTCTGATTCCCAAG_425	CTGAGCCTCTGATTCCCAAG
NM_001254_CTGTCGCAAACAGCAGGTGG_496	CTGTCGCAAACAGCAGGTGG
NM_001254_CTTAAGTGTATGTGAGTGAG_87	CTTAAGTGTATGTGAGTGAG
NM_001254_CTTTAATCCTAAAATGCCCC_517	CTTTAATCCTAAAATGCCCC
NM_001254_CTTTACCTTTCTGGTGCTCC_201	CTTTACCTTTCTGGTGCTCC
NM_001254_CTTTCTGGTGCTCCTGGAAC_203	CTTTCTGGTGCTCCTGGAAC
NM_001254_GAAAAACTGCCTGCTTAAGC_211	GAAAAACTGCCTGCTTAAGC
NM_001254_GAAAATCAAAGAGGTCACTC_479	GAAAATCAAAGAGGTCACTC
NM_001254_GAAGAGGTATCCAGGCCAGC_256	GAAGAGGTATCCAGGCCAGC
NM_001254_GAAGGACATGATGAGGAAAT_264	GAAGGACATGATGAGGAAAT
NM_001254_GAATTCTATCTGTGAGATCC_321	GAATTCTATCTGTGAGATCC
NM_001254_GACATCCATCTCCCTTTCCC_176	GACATCCATCTCCCTTTCCC
NM_001254_GACATTTGTTGGTTCTAGTT_34	GACATTTGTTGGTTCTAGTT
NM_001254_GAGGAGAACAGGTTACGGTT_41	GAGGAGAACAGGTTACGGTT
NM_001254_GATCTGGGACAGCTGTGTTC_165	GATCTGGGACAGCTGTGTTC
NM_001254_GATCTTCTGCTGAAGAGGGA_458	GATCTTCTGCTGAAGAGGGA
NM_001254_GCCCGAGACAGCTTCCTTTT_17	GCCCGAGACAGCTTCCTTTT
NM_001254_GCCTGCCAGGGAAAGGGAGA_176	GCCTGCCAGGGAAAGGGAGA
NM_001254_GCTCTTTGATGCTCTTGATC_470	GCTCTTTGATGCTCTTGATC
NM_001254_GCTGGAAGCCTTTACCTTTC_198	GCTGGAAGCCTTTACCTTTC
NM_001254_GGAGAACAAGGAGGTAAATG_70	GGAGAACAAGGAGGTAAATG
NM_001254_GGCTTTTACACGAGGAGAAC_45	GGCTTTTACACGAGGAGAAC
NM_001254_GGTATCCAGGCCAGCTGGGA_258	GGTATCCAGGCCAGCTGGGA
NM_001254_GGTGGGAAGTTCAACAGCTG_340	GGTGGGAAGTTCAACAGCTG
NM_001254_GTAAATGGGGAGTGTTGCAT_65	GTAAATGGGGAGTGTTGCAT
NM_001254_GTGAATAAGACCAACCCTCT_428	GTGAATAAGACCAACCCTCT
NM_001254_GTGGAGAACAAGGAGGTAAA_70	GTGGAGAACAAGGAGGTAAA
NM_001254_GTTACGGTTTGGACATTTGT_38	GTTACGGTTTGGACATTTGT
NM_001254_GTTTCCTGGGGCTGAGAGGC_52	GTTTCCTGGGGCTGAGAGGC
NM_001254_TAAAGTCTGTCGCAAACAGC_494	TAAAGTCTGTCGCAAACAGC
NM_001254_TACACGAGGAGAACAGGTTA_43	TACACGAGGAGAACAGGTTA
NM_001254_TACACTTAAGGGACGAAGAT_93	TACACTTAAGGGACGAAGAT
NM_001254_TACAGCCTGGGCAGTCCTCA_237	TACAGCCTGGGCAGTCCTCA
NM_001254_TATTGCTCAGGAGATTTGTC_249	TATTGCTCAGGAGATTTGTC
NM_001254_TATTGTACACGCTATTTGAA_300	TATTGTACACGCTATTTGAA
NM_001254_TATTTTGTTTTGGTGAACTT_115	TATTTTGTTTTGGTGAACTT
NM_001254_TCAAACCCGATCCCAGGCAC_6	TCAAACCCGATCCCAGGCAC
NM_001254_TCAACTGGACAGCAAAGGCC_291	TCAACTGGACAGCAAAGGCC
NM_001254_TCACAGATAGAATTCTACCT_326	TCACAGATAGAATTCTACCT
NM_001254_TCAGAGTGTTTGTCACTTTC_507	TCAGAGTGTTTGTCACTTTC
NM_001254_TCAGGACCAGCTTTGCTTGC_159	TCAGGACCAGCTTTGCTTGC
NM_001254_TCAGGAGATTTGTCAGGAAG_251	TCAGGAGATTTGTCAGGAAG
NM_001254_TCAGGGCTCTTGGAAGCCAG_513	TCAGGGCTCTTGGAAGCCAG
NM_001254_TCCAAAAAGGAAGCTGTCTC_18	TCCAAAAAGGAAGCTGTCTC
NM_001254_TCCATCTCCCTTTCCCTGGC_175	TCCATCTCCCTTTCCCTGGC
NM_001254_TCCCAGATCGGCTGCCTGCC_172	TCCCAGATCGGCTGCCTGCC
NM_001254_TCCCTGGCAGGCAGCCGATC_171	TCCCTGGCAGGCAGCCGATC
NM_001254_TCGGCTGCCTGCCAGGGAAA_174	TCGGCTGCCTGCCAGGGAAA
NM_001254_TCTCAGAAGTTGATGGTAAC_442	TCTCAGAAGTTGATGGTAAC
NM_001254_TCTCAGCCCCAGGAAACGTC_56	TCTCAGCCCCAGGAAACGTC
NM_001254_TCTGATTTCTGGTATAAGGT_345	TCTGATTTCTGGTATAAGGT
NM_001254_TCTTGAGGGAACACATCTGT_189	TCTTGAGGGAACACATCTGT
NM_001254_TCTTTCTTGCCTTGCTTTGG_77	TCTTTCTTGCCTTGCTTTGG
NM_001254_TGAAACAGCAGAGACTTTGC_379	TGAAACAGCAGAGACTTTGC
NM_001254_TGAACACAGCTGTCCCAGAT_168	TGAACACAGCTGTCCCAGAT
NM_001254_TGAATAAGACCAACCCTCTT_428	TGAATAAGACCAACCCTCTT
NM_001254_TGAGCCTCTGATTCCCAAGA_425	TGAGCCTCTGATTCCCAAGA
NM_001254_TGCTGAATTGCATGTCCTTG_234	TGCTGAATTGCATGTCCTTG
NM_001254_TGCTTTGGTGGAGAACAAGG_73	TGCTTTGGTGGAGAACAAGG
NM_001254_TGGAGAACAAGGAGGTAAAT_70	TGGAGAACAAGGAGGTAAAT
NM_001254_TGGTTCTAGTTTGGCATCAC_31	TGGTTCTAGTTTGGCATCAC
NM_001254_TGTAGCCTGTGCCTGGGATC_6	TGTAGCCTGTGCCTGGGATC
NM_001254_TGTATTCCCAGCTATTGCTC_245	TGTATTCCCAGCTATTGCTC
NM_001254_TGTCATCAGGAATTTCTTGA_184	TGTCATCAGGAATTTCTTGA
NM_001254_TGTGCCTGGGATCGGGTTTG_4	TGTGCCTGGGATCGGGTTTG
NM_001254_TGTGTTGGTATTGGACGAGA_283	TGTGTTGGTATTGGACGAGA
NM_001254_TTAAGTGTATGTGAGTGAGG_87	TTAAGTGTATGTGAGTGAGG
NM_001254_TTCAGGGCTCTTGGAAGCCA_513	TTCAGGGCTCTTGGAAGCCA
NM_001254_TTCCAAAAAGGAAGCTGTCT_18	TTCCAAAAAGGAAGCTGTCT
NM_001254_TTCTCTTTCTTGCCTTGCTT_78	TTCTCTTTCTTGCCTTGCTT
NM_001254_TTCTTGAGGGAACACATCTG_188	TTCTTGAGGGAACACATCTG
NM_001254_TTGCAGAATCCGGCTTAAGC_212	TTGCAGAATCCGGCTTAAGC
NM_001254_TTGCTACCAGCAAGCAAAGC_159	TTGCTACCAGCAAGCAAAGC
NM_001254_TTGGAAGCCAGGGGCATTTT_516	TTGGAAGCCAGGGGCATTTT
NM_001254_TTGGCTAGTTCTCTTTTGCT_109	TTGGCTAGTTCTCTTTTGCT
NM_001254_TTGGGAATCAGAGGCTCAGA_422	TTGGGAATCAGAGGCTCAGA
NM_001254_TTGTAGCCTGTGCCTGGGAT_6	TTGTAGCCTGTGCCTGGGAT
NM_001254_TTGTGCTCCTTCTTGGCTCA_449	TTGTGCTCCTTCTTGGCTCA
NM_001254_TTTAGGATTAAAGAGAAACA_522	TTTAGGATTAAAGAGAAACA
NM_001254_TTTCAGGGCTCTTGGAAGCC_513	TTTCAGGGCTCTTGGAAGCC
NM_001254_TTTCCTGGGGCTGAGAGGCA_52	TTTCCTGGGGCTGAGAGGCA
NM_001254_TTTGCGACAGACTTTACTGT_490	TTTGCGACAGACTTTACTGT
NM_001254_TTTGTCACTTTCAGGGCTCT_510	TTTGTCACTTTCAGGGCTCT
NM_001254_TTTGTCAGGAAGAGGTATCC_254	TTTGTCAGGAAGAGGTATCC
NM_001254_TTTTCTCTAGCTTGAAGCCT_330	TTTTCTCTAGCTTGAAGCCT
NM_002553_AAAGCACCACGTTTTCCAAG_4	AAAGCACCACGTTTTCCAAG
NM_002553_AAAGTCATTAAATGTTTCAC_97	AAAGTCATTAAATGTTTCAC
NM_002553_AAATCAGCTGAATACTCTGG_198	AAATCAGCTGAATACTCTGG
NM_002553_AACCAGGGTTAACAGCTGAA_391	AACCAGGGTTAACAGCTGAA
NM_002553_AACCTCTTGTCAGTTCTTGC_322	AACCTCTTGTCAGTTCTTGC
NM_002553_AACGTGATACTCGCAAACTG_251	AACGTGATACTCGCAAACTG
NM_002553_AAGCACCACGTTTTCCAAGT_4	AAGCACCACGTTTTCCAAGT
NM_002553_AATAATCTGTCTAGTGGAAA_358	AATAATCTGTCTAGTGGAAA
NM_002553_AATACTCTGGAGGATGATCA_194	AATACTCTGGAGGATGATCA
NM_002553_ACACAATTCACAAACACATG_59	ACACAATTCACAAACACATG
NM_002553_ACAGAAAGATGACACAGATC_285	ACAGAAAGATGACACAGATC
NM_002553_ACCACGGGTTCACAATATTT_236	ACCACGGGTTCACAATATTT
NM_002553_AGAAAGATGACACAGATCCG_286	AGAAAGATGACACAGATCCG
NM_002553_AGAATGAACTTAGAGTAATA_305	AGAATGAACTTAGAGTAATA
NM_002553_AGCAATATTATATAGTATCG_367	AGCAATATTATATAGTATCG
NM_002553_AGCACCACGTTTTCCAAGTG_4	AGCACCACGTTTTCCAAGTG
NM_002553_AGCAGAGTATCTAAGAGATA_130	AGCAGAGTATCTAAGAGATA
NM_002553_AGTATGTCCATAAATAAAAA_34	AGTATGTCCATAAATAAAAA
NM_002553_ATACTCTGGAGGATGATCAT_194	ATACTCTGGAGGATGATCAT
NM_002553_ATCCAGCAAGAACTGACAAG_323	ATCCAGCAAGAACTGACAAG
NM_002553_ATCTTTAAGATTTTCAGCTG_112	ATCTTTAAGATTTTCAGCTG
NM_002553_ATGGAAGCAAATCTTTTGCC_136	ATGGAAGCAAATCTTTTGCC
NM_002553_ATTGCTAATAATCTGTCTAG_360	ATTGCTAATAATCTGTCTAG
NM_002553_ATTTATGGACATACTGCTAG_38	ATTTATGGACATACTGCTAG
NM_002553_CAACAACGTTTGTGTTACAT_46	CAACAACGTTTGTGTTACAT
NM_002553_CAACCAGGGTTAACAGCTGA_391	CAACCAGGGTTAACAGCTGA
NM_002553_CACAATTCACAAACACATGT_58	CACAATTCACAAACACATGT
NM_002553_CAGAAAGATGACACAGATCC_285	CAGAAAGATGACACAGATCC
NM_002553_CAGCTGAAGGGTCACTAGAG_387	CAGCTGAAGGGTCACTAGAG
NM_002553_CATCTTAGTTCTTCAGAGGA_85	CATCTTAGTTCTTCAGAGGA
NM_002553_CATGGGACAGGATCTTTTGA_188	CATGGGACAGGATCTTTTGA
NM_002553_CCACATGAGTATGCGCTGAG_295	CCACATGAGTATGCGCTGAG
NM_002553_CCTCTCAGCGCATACTCATG_297	CCTCTCAGCGCATACTCATG
NM_002553_CTATGCAGACTGTTTATCTC_268	CTATGCAGACTGTTTATCTC
NM_002553_CTGATCGTCATGGCCAACCA_396	CTGATCGTCATGGCCAACCA
NM_002553_CTGGAGGATGATCATGGGAC_192	CTGGAGGATGATCATGGGAC
NM_002553_CTGTCTAGTGGAAATGGTTT_356	CTGTCTAGTGGAAATGGTTT
NM_002553_CTTCAGCTGTTAACCCTGGT_393	CTTCAGCTGTTAACCCTGGT
NM_002553_CTTTACATTGAGGCTGCTTT_70	CTTTACATTGAGGCTGCTTT
NM_002553_CTTTCTCAGTGAAATTGTTT_159	CTTTCTCAGTGAAATTGTTT
NM_002553_CTTTCTGTAGCTTTTCCCAC_278	CTTTCTGTAGCTTTTCCCAC
NM_002553_GAAAAGTTTCGTCCAAATAC_166	GAAAAGTTTCGTCCAAATAC
NM_002553_GAATCATCTTAGTTCTTCAG_84	GAATCATCTTAGTTCTTCAG
NM_002553_GACACTGTGCATTTGTATTT_407	GACACTGTGCATTTGTATTT
NM_002553_GACCCTTCAGCTGTTAACCC_392	GACCCTTCAGCTGTTAACCC
NM_002553_GCCTACATTAACATTCTTCT_209	GCCTACATTAACATTCTTCT
NM_002553_GCTGATCGTCATGGCCAACC_396	GCTGATCGTCATGGCCAACC
NM_002553_GGCCATGACGATCAGCTTGA_400	GGCCATGACGATCAGCTTGA
NM_002553_GGCTCAAAGCATCCAGTATT_169	GGCTCAAAGCATCCAGTATT
NM_002553_GTCCATCAAGCTGATCGTCA_399	GTCCATCAAGCTGATCGTCA
NM_002553_GTGGAAATGGTTTTGGCCCA_353	GTGGAAATGGTTTTGGCCCA
NM_002553_GTGTTGAATGCTTTACATTG_67	GTGTTGAATGCTTTACATTG
NM_002553_TAGAAATCAGCTGAATACTC_199	TAGAAATCAGCTGAATACTC
NM_002553_TATGCAGACTGTTTATCTCA_268	TATGCAGACTGTTTATCTCA
NM_002553_TATTGTGAACCCGTGGTTAA_239	TATTGTGAACCCGTGGTTAA
NM_002553_TCAGGGAAATATAAGACAAA_176	TCAGGGAAATATAAGACAAA
NM_002553_TCCAAACAAGGACTGCAAGA_18	TCCAAACAAGGACTGCAAGA
NM_002553_TCCAAGAAGAATGTTAATGT_208	TCCAAGAAGAATGTTAATGT
NM_002553_TCCATCTTGCAGTCCTTGTT_19	TCCATCTTGCAGTCCTTGTT
NM_002553_TCCTAAATATTGTGAACCCG_237	TCCTAAATATTGTGAACCCG
NM_002553_TCTTGTAATCTAAGAAATCC_141	TCTTGTAATCTAAGAAATCC
NM_002553_TCTTTCTCAGTGAAATTGTT_159	TCTTTCTCAGTGAAATTGTT
NM_002553_TGCATAGCTTTCTTCAAATG_261	TGCATAGCTTTCTTCAAATG
NM_002553_TGGGAAAAAATATTTGCTGT_378	TGGGAAAAAATATTTGCTGT
NM_002553_TGTCCATAAATAAAAATGGA_33	TGTCCATAAATAAAAATGGA
NM_002553_TTCGTGTTTTTTTAGAAAGT_340	TTCGTGTTTTTTTAGAAAGT
NM_002553_TTGCTGGATTGTATGAAGCA_316	TTGCTGGATTGTATGAAGCA
NM_002553_TTTCCATCCATTTTTATTTA_33	TTTCCATCCATTTTTATTTA
NM_002553_TTTCTGTAGCTTTTCCCACT_278	TTTCTGTAGCTTTTCCCACT
NM_004153_AAAACGGAAAGTGGCCTTCT_266	AAAACGGAAAGTGGCCTTCT
NM_004153_AAAAGCAACAGCCAACCATG_594	AAAAGCAACAGCCAACCATG
NM_004153_AAACTCCTTGACCATACCGG_524	AAACTCCTTGACCATACCGG
NM_004153_AAACTTATTCATGGGTTGGC_16	AAACTTATTCATGGGTTGGC
NM_004153_AACAAATGCCGTTTACAGGC_98	AACAAATGCCGTTTACAGGC
NM_004153_AACACTTACCCCTATCAGTG_338	AACACTTACCCCTATCAGTG
NM_004153_AACCCATGAATAAGTTTTTC_12	AACCCATGAATAAGTTTTTC
NM_004153_AACTCTTTCTGCGGATACGA_378	AACTCTTTCTGCGGATACGA
NM_004153_AAGCCGGGCCTCCTTATGAG_642	AAGCCGGGCCTCCTTATGAG
NM_004153_AAGCTGCAATTCGGGTTCTC_319	AAGCTGCAATTCGGGTTCTC
NM_004153_AAGGAGCAGATCGTTCCTGC_838	AAGGAGCAGATCGTTCCTGC
NM_004153_AAGTCTGCTGGGACATCTGA_246	AAGTCTGCTGGGACATCTGA
NM_004153_AATATTCTGGTATGATTACC_115	AATATTCTGGTATGATTACC
NM_004153_AATCTGGATGTGAATCTCGG_44	AATCTGGATGTGAATCTCGG
NM_004153_AATTGCCAGGACCACAAGCC_647	AATTGCCAGGACCACAAGCC
NM_004153_ACAAATGCCGTTTACAGGCA_97	ACAAATGCCGTTTACAGGCA
NM_004153_ACACTTACCCCTATCAGTGG_338	ACACTTACCCCTATCAGTGG
NM_004153_ACAGTTCTGGGTGCTCTCCT_434	ACAGTTCTGGGTGCTCTCCT
NM_004153_ACAGTTTGTGTTGATTGAAG_54	ACAGTTTGTGTTGATTGAAG
NM_004153_ACATGTGGCACTGTGCAGAA_805	ACATGTGGCACTGTGCAGAA
NM_004153_ACCACATCCTTTGGGGCTAA_139	ACCACATCCTTTGGGGCTAA
NM_004153_ACCGAGATTCACATCCAGAT_46	ACCGAGATTCACATCCAGAT
NM_004153_ACCTCAATGTATTGAAAGGG_563	ACCTCAATGTATTGAAAGGG
NM_004153_ACCTGAGTCTCTTCCCTGTC_504	ACCTGAGTCTCTTCCCTGTC
NM_004153_ACCTTAGGATCTGCTGCAGC_686	ACCTTAGGATCTGCTGCAGC
NM_004153_ACCTTTAGCCCCAAAGGATG_140	ACCTTTAGCCCCAAAGGATG
NM_004153_ACGATCTGCTCCTTCGGGTG_843	ACGATCTGCTCCTTCGGGTG
NM_004153_ACTCGAGCACGTTTCTTAGG_81	ACTCGAGCACGTTTCTTAGG
NM_004153_ACTCTGCGAGGATGGCTCTC_779	ACTCTGCGAGGATGGCTCTC
NM_004153_ACTCTTACTCTTGGCTCTCA_191	ACTCTTACTCTTGGCTCTCA
NM_004153_ACTCTTTCTGCGGATACGAT_378	ACTCTTTCTGCGGATACGAT
NM_004153_ACTTTCCGTTTTATTCTTCC_261	ACTTTCCGTTTTATTCTTCC
NM_004153_ACTTTCCTCAGAACTATTTG_171	ACTTTCCTCAGAACTATTTG
NM_004153_AGAAAAACTTATTCATGGGT_14	AGAAAAACTTATTCATGGGT
NM_004153_AGAAACGTGCTCGAGTACAG_85	AGAAACGTGCTCGAGTACAG
NM_004153_AGAACACTTACCCCTATCAG_337	AGAACACTTACCCCTATCAG
NM_004153_AGACCAGAAAAACTTATTCA_13	AGACCAGAAAAACTTATTCA
NM_004153_AGACCATCATTGGCCTTGTT_131	AGACCATCATTGGCCTTGTT
NM_004153_AGAGCGAATCATGATGAACC_663	AGAGCGAATCATGATGAACC
NM_004153_AGAGTGCAGAGAGCCCTTCT_199	AGAGTGCAGAGAGCCCTTCT
NM_004153_AGAGTTCCGTCGATCAGGAC_787	AGAGTTCCGTCGATCAGGAC
NM_004153_AGATTTGCACATAGACTTGG_578	AGATTTGCACATAGACTTGG
NM_004153_AGCAAACTCCTTGACCATAC_523	AGCAAACTCCTTGACCATAC
NM_004153_AGCAGGACGGTGGTTTCCTG_613	AGCAGGACGGTGGTTTCCTG
NM_004153_AGCCCACTCAATGGAAGCTG_752	AGCCCACTCAATGGAAGCTG
NM_004153_AGCCGGGCCTCCTTATGAGT_642	AGCCGGGCCTCCTTATGAGT
NM_004153_AGCTTCCATTGAGTGGGCTA_749	AGCTTCCATTGAGTGGGCTA
NM_004153_AGGAAGAATAAAACGGAAAG_263	AGGAAGAATAAAACGGAAAG
NM_004153_AGGAGCAGATCGTTCCTGCT_838	AGGAGCAGATCGTTCCTGCT
NM_004153_AGGAGGCACATGAAGTCTGC_250	AGGAGGCACATGAAGTCTGC
NM_004153_AGGAGTTTGGCGAGATTTGG_220	AGGAGTTTGGCGAGATTTGG
NM_004153_AGGCAGGGACTTCACAGAAT_92	AGGCAGGGACTTCACAGAAT
NM_004153_AGGCCTTTAGATGCTTGAGC_694	AGGCCTTTAGATGCTTGAGC
NM_004153_AGGCTTCGACTACGGATCTG_474	AGGCTTCGACTACGGATCTG
NM_004153_AGGGAGGAACATCATTGGCT_557	AGGGAGGAACATCATTGGCT
NM_004153_AGGGGAGTCAGGCTTCTGCT_738	AGGGGAGTCAGGCTTCTGCT
NM_004153_AGGTGAGGTGATCTCCGAGA_269	AGGTGAGGTGATCTCCGAGA
NM_004153_AGGTTCCTGGACACAGTTCT_438	AGGTTCCTGGACACAGTTCT
NM_004153_AGTAGAGGTCGCTTCATTCT_370	AGTAGAGGTCGCTTCATTCT
NM_004153_AGTCTCTCTGGTTTTCTCTG_294	AGTCTCTCTGGTTTTCTCTG
NM_004153_AGTGATACGCTGCCTGCAGC_550	AGTGATACGCTGCCTGCAGC
NM_004153_AGTTTGGCGAGATTTGGAGG_219	AGTTTGGCGAGATTTGGAGG
NM_004153_ATAAGAGAGTCCAGTCTCTC_298	ATAAGAGAGTCCAGTCTCTC
NM_004153_ATAGGGCTGGAAGCACATCC_676	ATAGGGCTGGAAGCACATCC
NM_004153_ATCCACAGCTTCCATTGAGT_751	ATCCACAGCTTCCATTGAGT
NM_004153_ATCCTTACATACCCTCACGA_453	ATCCTTACATACCCTCACGA
NM_004153_ATCTCCGGTGTCCCTGGGAC_535	ATCTCCGGTGTCCCTGGGAC
NM_004153_ATCTCTGTCCCCCACTGATA_339	ATCTCTGTCCCCCACTGATA
NM_004153_ATCTGAGGAGCGGCACAACG_469	ATCTGAGGAGCGGCACAACG
NM_004153_ATGACTTCAAGGAAGATCGC_444	ATGACTTCAAGGAAGATCGC
NM_004153_ATGCCATCCAGCTGGTAGCC_707	ATGCCATCCAGCTGGTAGCC
NM_004153_ATGGCCGTGTGTTCTCACCT_823	ATGGCCGTGTGTTCTCACCT
NM_004153_ATGGGTTGGCAGGCCCTTGT_19	ATGGGTTGGCAGGCCCTTGT
NM_004153_ATGTACATCTCCGGTGTCCC_533	ATGTACATCTCCGGTGTCCC
NM_004153_ATTAATGCGGAGACCATCAT_127	ATTAATGCGGAGACCATCAT
NM_004153_ATTCTCCAGGAAGAATAAAA_261	ATTCTCCAGGAAGAATAAAA
NM_004153_ATTGACCTCAATGTATTGAA_564	ATTGACCTCAATGTATTGAA
NM_004153_ATTTGCACATAGACTTGGTG_578	ATTTGCACATAGACTTGGTG
NM_004153_CAAAGCAATTCTGCACCCGA_606	CAAAGCAATTCTGCACCCGA
NM_004153_CAACCATGCGGCAGAACTGC_598	CAACCATGCGGCAGAACTGC
NM_004153_CAACTCCGCAAATAGTTCTG_171	CAACTCCGCAAATAGTTCTG
NM_004153_CAAGCAATTTAGCAACATAC_64	CAAGCAATTTAGCAACATAC
NM_004153_CAAGGAAGATCGCAGGTTCC_442	CAAGGAAGATCGCAGGTTCC
NM_004153_CAATTGCCAGGACCACAAGC_647	CAATTGCCAGGACCACAAGC
NM_004153_CACCTTCGTGAGGGTATGTA_452	CACCTTCGTGAGGGTATGTA
NM_004153_CACGGCCATGGTCTCTGACA_817	CACGGCCATGGTCTCTGACA
NM_004153_CACTCTTTGTGAAACTATCC_157	CACTCTTTGTGAAACTATCC
NM_004153_CACTGTCTGGAGATGCACGA_718	CACTGTCTGGAGATGCACGA
NM_004153_CACTTGGCTGCACTCTCTTG_181	CACTTGGCTGCACTCTCTTG
NM_004153_CAGAATATTTCCTGTGCACC_109	CAGAATATTTCCTGTGCACC
NM_004153_CAGAGCGAATCATGATGAAC_663	CAGAGCGAATCATGATGAAC
NM_004153_CAGCACACTGGCTGGCTCCT_483	CAGCACACTGGCTGGCTCCT
NM_004153_CAGCAGAACATGTGGCCAAA_208	CAGCAGAACATGTGGCCAAA
NM_004153_CAGCAGAAGCCTGACTCCCC_740	CAGCAGAAGCCTGACTCCCC
NM_004153_CAGCAGTTCTGCCGCATGGT_596	CAGCAGTTCTGCCGCATGGT
NM_004153_CAGCCTCTTTCTGGCTCTTG_232	CAGCCTCTTTCTGGCTCTTG
NM_004153_CAGGAACGATCTGCTCCTTC_841	CAGGAACGATCTGCTCCTTC
NM_004153_CAGGGGAGTCAGGCTTCTGC_738	CAGGGGAGTCAGGCTTCTGC
NM_004153_CAGGTGAGAACACACGGCCA_821	CAGGTGAGAACACACGGCCA
NM_004153_CAGGTTCCTGGACACAGTTC_438	CAGGTTCCTGGACACAGTTC
NM_004153_CAGTCTCTCTGGTTTTCTCT_294	CAGTCTCTCTGGTTTTCTCT
NM_004153_CATCCACAGCTTCCATTGAG_751	CATCCACAGCTTCCATTGAG
NM_004153_CATGGCCGTGTGTTCTCACC_823	CATGGCCGTGTGTTCTCACC
[truncated: 528 more rows]
