# Supplementary material for: The human origin recognition complex is essential for pre-RC assembly, mitosis, and maintenance of nuclear structure
Source: eLife. 2021 Feb 1;10:e61797. doi: 10.7554/eLife.61797 (PMC7877914; doi:10.7554/eLife.61797)
Supplement: Supplementary file 2. [file elife-61797-supp2.xlsx]

## Sheet: ORC1-6,CDC6
Reverse Primer	Primer sequence 5'-3'
P7-rev-LRG	CAAGCAGAAGACGGCATACGAGATGTGACTGGAGTTCAGACGTGTGCTCTTCCGATCTCTGTTTCCAGCATAGCTCTTAAAC
Forward Primer	Primer sequence 5'-3'
Cas9-LRG-P5-BC-1	P5-Read1_primer-NHNNNNATCACGGTGGAAAGGACGAAACACC
Cas9-LRG-P5-BC-3	P5-Read1_primer-NHNNNNNNTTAGGCGTGGAAAGGACGAAACACC
Cas9-LRG-P5-BC-4	P5-Read1_primer-NHNNNNNNNTGACCAGTGGAAAGGACGAAACACC
Cas9-LRG-P5-BC-11	P5-Read1_primer-NHNNNNGGCTACGTGGAAAGGACGAAACACC
Cas9-LRG-P5-BC-12	P5-Read1_primer-NHNNNNNCTTGTAGTGGAAAGGACGAAACACC
Cas9-LRG-P5-BC-23	P5-Read1_primer-NHNNNNNGAGTGGGTGGAAAGGACGAAACACC
