# Supplementary material for: The human origin recognition complex is essential for pre-RC assembly, mitosis, and maintenance of nuclear structure
Source: eLife. 2021 Feb 1;10:e61797. doi: 10.7554/eLife.61797 (PMC7877914; doi:10.7554/eLife.61797)
Supplement: Supplementary file 3. [file elife-61797-supp3.xlsx]

## Sheet: Sheet1
Forward Primer	Primer sequence 5'-3'
Actin_F	GTCATTCCAAATATGAGATGCGT
Exon 3-4_F	GGAAGACAAGATGCTGGAGGTTCAC
Exon 4-5_F	GATTTGGAGGAAGATGACCAGGAG
Exon 5-6_F	CTGCTACAGGTGGTGGAAATAAAG
Exon 6-7_F	CTTCAGAACTAGCAAAAACACCAC
Exon 7-8_F	GCCATTCTGCTTCAGACAAGG
Exon 8-9_F	CAAAAGTGAATTTCTGTCAACAGC
Exon 9-10_F	GCTCAGAATAGAGTAGTTTCAGC
Exon 10-11_F	GAAGCTCACAGCAGTTCAAAAG
Exon 11-12_F	CCTTTTCTGCCGAACTTAAACAAC
Exon 12-13_F	CGAACCACTATGCTGCAAGATTCC
Exon 13-14_F	CGATCATATGGGTACTTTCCGC
Exon 14-15_F	CATTGGTCAGTTGTCATCTTTGC
Exon 15-16_F	GGTAAAGCAGTCTGGATCCCTG
Exon 16-17_F	CAATAGTGATCTGACACTCCGGG
Reverse Primer	Primer sequence 5'-3'
Actin_R	GCTATCACCTCCCCTGTGTG
Exon 3-4_R	CATCTTCCTCCAAATCATATTCTGGC
Exon 4-5_R	CTTTATTTCCACCACCTGTAGCAG
Exon 5-6_R	GAACGTTTATCGTAATCTCAGGATC
Exon 6-7_R	CTTCGGTTGAACCTTGTCTGAAGC
Exon 7-8_R	ATCTTTTTCTTAGACTACGAGGTGC
Exon 8-9_R	AGTGTCCTCTTCATGTTCCTGTG
Exon 9-10_R	GCTTCTGCAGTGTTCTATCAGAGG
Exon 10-11_R	CGGCAGAAAAGGAAGGGGAAAC
Exon 11-12_R	GCATAGTGGTTCGAAACCTTTCTAG
Exon 12-13_R	CCAGTATACTGCGGAAAGTACCC
Exon 13-14_R	CTTCTCTCCTCTCAACATCTGGC
Exon 14-15_R	ATGTAGTAGTTTCATACCAGAGCCAG
Exon 15-16_R	CCAATGTAAGAAGGGTTATCCTGG
Exon 16-17_R	CAGTCAATGTTCCATTATCAACAGG
